# Supplementary material for: The Maize (Zea mays L.) AUXIN/INDOLE-3-ACETIC ACID Gene Family: Phylogeny, Synteny, and Unique Root-Type and Tissue-Specific Expression Patterns during Development
Source: PubMed Central journal article supplement (PMC3815225; doi:10.1371/journal.pone.0078859), 2013-11-01
Supplement: pone.0078859.s001.pdf [file pone.0078859.s001.pdf]

ZnIA20/1-234 ..... MAWNR FGDDEEGSLELSLPL ..... GYFSGPTQAAAFEDKADGSAAAA  
 ZnIA33/1-228 ..... MAWNR FGDDEEGSLELSLPL ..... GYFSGPDQAAFEEKASRSAAAPP  
 ZnIA4/1-228 ..... MAWRPLGAGEALDLSLESLPL ..... AYFA-RPSGLDAAREEAEASAYAIQ  
 ZnIA16/1-289 ..... MGDAETNKTLHNMWEPFRPSSDQRDEETLQLSLGLPG ..... GGASAGGGVAAWRMLPARDEEMRSAAVVDTSLLSLG  
 ZnIA9/1-357 ..... DQKE RKGREADDAGRSKNSSGGGG ..... EED AKLELKLGLPGLTLVEEGTTATVPRDGVQLQRETTITLTLSCFRNPKSRAVDAATA  
 ZnIA23/1-346 DEREWTVTREVVEDGGAGSSTSATATAASDHEEEDYSKLELRCLPG ..... AQDDERTPPPPG ..... EKGTCTALSLGGCFPSHFKLAASASATAATW  
 ZnIA11/1-251 ..... MKLKG ..... EQADDDCSKMQGGRGLMSLELRLGSSDNG ..... DASCGDPLWLVG  
 ZnIA34/1-355 ..... MLNLAFETPPLRQRERTNTIVTATAAARGN ..... EESSNTLQLHGHLDLGLGSLSHGGGGGGSCDASSCGGNKQDSYGGGQ  
 ZnIA6/1-198 ..... MAECK ..... DDDS ..... GRRSPSSMDSST  
 ZnIA18/1-197 ..... MELEGLAP ..... FNPH ..... QPLAAAAEFVGLLSSAG  
 ZnIA30/1-216 ..... MELEGLAL ..... PTRHR ..... QPLAA ..... GLLGEGAG  
 ZnIA17/1-206 ..... MELEGLAP ..... PSARRPTMTIDQQQQQLRLAEDELSSSTSD  
 ZnIA12/1-293 ..... MRGGGAGPTAAFMSDEPPPADAEVEENSQAEE ..... EDEETVVEGDDLELGLLQSKQQQQHPPPCRIILTA  
 ZnIA1/1-225 MEVAAAASYSYYLEAADDV ..... DNLRALELRGLPGTA ..... AEEEEEARQAKVAAPP  
 ZnIA9/1-229 MEVAAAASYSYYLEAADDV ..... DNLRALELRGLPGTEE ..... KEAEEEP ..... QHKAAPP  
 ZnIA15/1-224 METVVG ..... DLMATELRGLPGTVD ..... DCSHQHQQTQLKVAAPP  
 ZnIA32/1-226 METVVG ..... DLMATELRGLPGTVD ..... DCSQV ..... PQLVKATPPS  
 ZnIA3/1-202 MEMIDA ..... ELRGLPPGSSN ..... SDVVTVVPPAAARKFAA  
 ZnIA13/1-181 MEMIDA ..... ELRGLPPGSSN ..... RDVINVVQPSLAA  
 ZnIA25/1-66 ..... DGVDLTLETLGPPGVN ..... DGVDLTLETLGPPGVN  
 ZnIA24/1-115 MAGYGD ..... DGVDLTLETLGPPGVN ..... DGVDLTLETLGPPGVN  
 ZnIA26/1-139 MAGYGD ..... DGVDLTLETLGPPGVN ..... DGVDLTLETLGPPGVN  
 ZnIA10/1-269 MSPLLEPHDYIGLSAVAAAAAFTPTTPTSSSSSSSSAPRLTLRGLPGSES ..... PDRDRD ..... CCEDVAATLSLGLFAA  
 ZnIA29/1-272 MSPLLEPHDYIGLSAAAAAAFTPTTSSSSSSSSAPRLTLRGLPGSES ..... PDRDRDRDCEDVAATLSLGLFAATKAP  
 ZnIA21/1-244 MSPLLDLDYIGLSFAAAAAAHDLLKGT ..... ELRGLPGSSG ..... PDRRVV ..... AATATLDDLFAKAK  
 ZnIA28/1-255 MSPLLDLDYIGLSPFAAAAAAENDELKGT ..... ELRGLPGSSG ..... PDRRVV ..... AATATLDDLFAKAK  
 ZnIA2/1-237 MAGADVDVG ..... TELRGLPGGG ..... ADAAKAAKR ..... FEDTIDLKLPFAAMEEA  
 ZnIA14/1-228 MAGADVDVG ..... TELRGLPGGG ..... AAAAAK ..... KDTIDLKLPFAAMEEA  
 ZnIA7/1-270 MATTDLGFEA ..... TELRGLPGGGGGEP ..... ALGGEGRSSSSASGRFAETIDLKLPFAAVVEEEEE  
 ZnIA5/1-220 ..... MSVFERSTES ..... SGASGLDFEDATLTLRPGSARFAAAAAAASLSLSSSSSSAFD  
 ZnIA27/1-186 ..... MSVDERSTES ..... SAASGLYEDTALTLRPGS ..... SAASRLGYEDTALTLRPGS  
 ZnIA22/1-231 WSTARSPSFLFLSLGLRFPQSQSRRARSFACTPPFAMSVDERSTES ..... SAASRLGYEDTALTLRPGS ..... SAASRLGYEDTALTLRPGS  
 ZnIA31/1-255 WSIA SPSPFLFLSLGLRFPQSQSRRARWFACTPPFAMSVDERSTES ..... SAASRLGYEDTALTLRPGS ..... SAASRLGYEDTALTLRPGS  
 ZnIA19/1-198 ..... MQQDLRNSER RNPEQAHP ..... VMSAS ..... TNSAAS ..... FAVSGLDYDDT ..... ALTALPGS

I

ZnIA20/1-234 ..... APVVGWPPVRAFRRNLASASSKPSRDPPPSHRGNESASVGAAGKAVEGGNK ..... GLFVKVNMGGVPIGRKLDLGGHAGYDTLTAVDHLFRGLLSAQ  
 ZnIA33/1-228 ..... APVVGWPPVRAFRRNLATSSSKPS ..... SHGKPEAAS ..... ADGGNK ..... GLFVKVNMGGVPIGRKLDLAAHAGYDTLSAAVDSLFRGLFAAQ  
 ZnIA4/1-228 ..... APVVGWPPVRAFRRNLASASSKPS ..... SHKHTROE ..... GSAKD ..... GLFVKVNMGGVPIGRKVDLTAAGYADLSAAVGLKFRGLLAAQRD  
 ZnIA16/1-289 ..... TPVIGWPPVRAFRRNLATS SRAS ..... LEHQNGKEDIK ..... EQTTKR ..... APFVKINMGGVPIGRKIDLSALGSDLSVVDKFRGLLAAQDD  
 ZnIA9/1-357 AHVQLQRSPAPVVGWPPVRAFRRNLAAHHHGGSSKQPTENQSEASR ..... KEKPACKK ..... NPLVKINMGGVPIGRKVDLTAAGYADLSAAVGLKFRGLLAAQKD  
 ZnIA23/1-346 GVDL ..... PVVGWPPVRAFRRNLANASSKQSLDQQQNDDEASCD ..... KAKQTCR ..... SLLIKINMGGVPIGRKIDLSALGSDLSVVDKFRGLLAAQKD  
 ZnIA11/1-251 RR ..... SHLQVSKTVEEPAGKVKSGGERLFAATMFKVNMGGVPIGRKVDLTAAGYADLSAAVGLKFRGLLAAQKD  
 ZnIA34/1-355 RRNIIVSAMHVLINLKTAGASAVAGGGTGGSTTTATHGGGETNAAAAAALARPALAS ..... SFMAKVVHMGYAIIGKVNLRADGGDSLRLTNMATAFFCF  
 ZnIA6/1-198 ..... DLQLGLSLSPASSALLMAETNNSIVPSTPRNQALDWPPIKFLRSALTSARRRR ..... TLFVKVNMGGVPIGRKLDLMDLGGSLAKLCHMFKASITY  
 ZnIA18/1-197 ..... LFLVEDGDDGGDRDRDGGVVDHEQQSNVPRKRLRVLGWPVKARRSCGGG ..... YVVKVNMGGVPIGRKVDLSLHGGYQELRLTESMFPSSNQ  
 ZnIA30/1-216 ..... LFLRDDDDGGDRGGDRGGVVDHEQQNDDEASCD ..... KRLLVGGWPVKARRSCGGG ..... YVVKVNMGGVPIGRKVDLSLHGGYQELRLTESMFPSSNQ  
 ZnIA17/1-206 ..... TTLPLFDGSSGGGRGGG ..... KRPLVGGWPVLSARRSRACGGG ..... AKYVVKVNMGGVPIGRKVDLSLHGGYQELRLTESMFPSSNQ  
 ZnIA12/1-293 PGTVASGHPQSGVVVGGWPIRTFRMNSLFLNQAENASEAGAKKPIVEPDMQEDKEESKQRRT ..... VGVVNMGGVPIGRKVDLSLHGGYQELRLTESMFPSSNQ  
 ZnIA1/1-225 ..... AQVVGWPPVRAFRRNLASASSKPSRDPPPSHRGNESASVGAAGKAVEGGNK ..... GLFVKVNMGGVPIGRKVDLTAAGYADLSAAVGLKFRGLLAAQKD  
 ZnIA9/1-229 ..... AQVVGWPPVRAFRRNLASASSKPSRDPPPSHRGNESASVGAAGKAVEGGNK ..... GLFVKVNMGGVPIGRKVDLTAAGYADLSAAVGLKFRGLLAAQKD  
 ZnIA15/1-224 ..... APVVGWPPVRAFRRNLASASSKPSRDPPPSHRGNESASVGAAGKAVEGGNK ..... GLFVKVNMGGVPIGRKVDLTAAGYADLSAAVGLKFRGLLAAQKD  
 ZnIA32/1-226 ..... APVVGWPPVRAFRRNLASASSKPSRDPPPSHRGNESASVGAAGKAVEGGNK ..... GLFVKVNMGGVPIGRKVDLTAAGYADLSAAVGLKFRGLLAAQKD  
 ZnIA3/1-202 ..... VRVGGWPPVRAFRRNLASASSKPSRDPPPSHRGNESASVGAAGKAVEGGNK ..... GLFVKVNMGGVPIGRKVDLTAAGYADLSAAVGLKFRGLLAAQKD  
 ZnIA13/1-181 ..... QVVGWPPVRAFRRNLASASSKPSRDPPPSHRGNESASVGAAGKAVEGGNK ..... GLFVKVNMGGVPIGRKVDLTAAGYADLSAAVGLKFRGLLAAQKD  
 ZnIA25/1-66 ..... ARKNGQDPPS ..... SSAMTMQ ..... AFVKVNMGGVPIGRKVDLTAAGYADLSAAVGLKFRGLLAAQKD  
 ZnIA24/1-115 ..... ARKNGQDPPS ..... SSAMTMQ ..... AFVKVNMGGVPIGRKVDLTAAGYADLSAAVGLKFRGLLAAQKD  
 ZnIA26/1-139 ..... ARKNGQDPPS ..... SSAMTMQ ..... AFVKVNMGGVPIGRKVDLTAAGYADLSAAVGLKFRGLLAAQKD  
 ZnIA10/1-269 ..... AQVVGWPPVRAFRRNLASASSKPSRDPPPSHRGNESASVGAAGKAVEGGNK ..... GLFVKVNMGGVPIGRKVDLTAAGYADLSAAVGLKFRGLLAAQKD  
 ZnIA29/1-272 ..... AQVVGWPPVRAFRRNLASASSKPSRDPPPSHRGNESASVGAAGKAVEGGNK ..... GLFVKVNMGGVPIGRKVDLTAAGYADLSAAVGLKFRGLLAAQKD  
 ZnIA21/1-244 ..... AQVVGWPPVRAFRRNLASASSKPSRDPPPSHRGNESASVGAAGKAVEGGNK ..... GLFVKVNMGGVPIGRKVDLTAAGYADLSAAVGLKFRGLLAAQKD  
 ZnIA28/1-255 ..... AQVVGWPPVRAFRRNLASASSKPSRDPPPSHRGNESASVGAAGKAVEGGNK ..... GLFVKVNMGGVPIGRKVDLTAAGYADLSAAVGLKFRGLLAAQKD  
 ZnIA2/1-237 ..... AQVVGWPPVRAFRRNLASASSKPSRDPPPSHRGNESASVGAAGKAVEGGNK ..... GLFVKVNMGGVPIGRKVDLTAAGYADLSAAVGLKFRGLLAAQKD  
 ZnIA14/1-228 ..... AQVVGWPPVRAFRRNLASASSKPSRDPPPSHRGNESASVGAAGKAVEGGNK ..... GLFVKVNMGGVPIGRKVDLTAAGYADLSAAVGLKFRGLLAAQKD  
 ZnIA7/1-270 ..... AQVVGWPPVRAFRRNLASASSKPSRDPPPSHRGNESASVGAAGKAVEGGNK ..... GLFVKVNMGGVPIGRKVDLTAAGYADLSAAVGLKFRGLLAAQKD  
 ZnIA5/1-220 ..... ARVVGWPPVRAFRRNLADAAAGSSKA ..... AKFVKVNMGGVPIGRKVDLTAAGYADLSAAVGLKFRGLLAAQKD  
 ZnIA27/1-186 ..... TRVVGWPPVRAFRRNLADSSKANRS ..... ASFKVNMGGVPIGRKVDLTAAGYADLSAAVGLKFRGLLAAQKD  
 ZnIA22/1-231 ..... ARVVGWPPVRAFRRNLADSSKASRA ..... ANFKVNMGGVPIGRKVDLTAAGYADLSAAVGLKFRGLLAAQKD  
 ZnIA31/1-255 ..... ARVVGWPPVRAFRRNLADSSKASRA ..... ANFKVNMGGVPIGRKVDLTAAGYADLSAAVGLKFRGLLAAQKD  
 ZnIA19/1-198 ..... ARVVGWPPVRAFRRNLADDFAR ..... LVVNMGGVPIGRKVDLTAAGYADLSAAVGLKFRGLLAAQKD

II

III

ZnIA20/1-234 ..... LGGG ..... EYTLVYEDDEGQMLVG ..... DVPWGM ..... FAATARRLRLVRSDDLNS ..... SLRAAT ..... RKRAAA  
 ZnIA33/1-228 ..... LGGG ..... EHTLVYEDDEGQMLVG ..... DVPWPM ..... FVATARRLRLVRSDDLNS ..... SLRAAR ..... AAEC  
 ZnIA4/1-228 ..... LGGG ..... DYTLYVEDDEGQMLVG ..... DVPWEM ..... FVATARRLRLVRSDDLNS ..... SLRAAR ..... PERSAADCCC  
 ZnIA16/1-289 ..... LDGSG ..... EYTLVYEDDEGQMLVG ..... DVPWGM ..... FVSVKRLRLVRSDDLNS ..... LTAPP ..... QKRTVTECPVFTS  
 ZnIA9/1-357 ..... LDGSG ..... EYTLVYEDDEGQMLVG ..... DVPWNV ..... FVSTAKRLRLVRSDDLNS ..... TRPQIYAVPRRPPDC  
 ZnIA23/1-346 ..... LDGSG ..... EYTLVYEDDEGQMLVG ..... HLPWNV ..... FVSTAKRLVMSSELPHGLIKT ..... ASERADD  
 ZnIA11/1-251 ..... KGGGSKSNKKA ..... ILLYEDDEGQMLVG ..... DVPWEL ..... FMAVSKRLYLIAQDPRTKKN .....  
 ZnIA34/1-355 ..... DKG ..... FIFLYEDDEGQMLVG ..... DVPWEL ..... FLASAKGLYIVRKPSITRRQSG .....  
 ZnIA6/1-198 ..... AA ..... HVLTYEDHGGDMMVVG ..... DVPWEL ..... FLGSKRLKILARTDR .....  
 ZnIA18/1-197 ..... VSHERRRRH ..... FYVVTYEDDEGQMLVG ..... DVPWEV ..... FVKSVKRLKILAR .....  
 ZnIA30/1-216 ..... ASHERRRLLHR ..... FYVVTYEDDEGQMLVG ..... DVPWEV ..... FVKSVKRLKILAR .....  
 ZnIA17/1-206 ..... AAAATTTSHRDVVVTYEDDEGQMLVG ..... DVPWDD ..... FARSVKRLKLLG .....  
 ZnIA12/1-293 ..... SE ..... NQLTYEDRDGQMLVG ..... DVPWEM ..... FVSVKRLKIMRTDAKGLGPRFQSHRPTACTRGT .....  
 ZnIA1/1-225 ..... GGGSPDFAVTYEDKDDMLVG ..... DVPFSS ..... MFISTCKRLRIMKGEARLGLSAKND .....  
 ZnIA9/1-229 ..... AVNPSDFAVTYEDKDDMLVG ..... DVPFSG ..... MFISTCKRLRIMKGEARLGLSAKND .....  
 ZnIA15/1-224 ..... NNLSDFAVTYEDKDDMLVG ..... DVPFSE ..... MFISTCKRLRIMKGEARLGLSAKND .....  
 ZnIA32/1-226 ..... LSEFVAVTYEDKDDMLVG ..... DVPFSE ..... MFISTCKRLRIMKGEARLGLSAKND .....  
 ZnIA3/1-202 ..... CDFAVTYEDKDDMLVG ..... DVPWE ..... MFISTCKRLRIMKGEARLGLSAKND .....  
 ZnIA13/1-181 ..... CDFAVTYEDKDDMLVG ..... DVPWE ..... MFISTCKRLRIMKGEARLGLSAKND .....  
 ZnIA25/1-66 ..... DHHHAIAIYEDKDDMLVG ..... DVPWE ..... MFISTCKRLRIMKGEARLGLSAKND .....  
 ZnIA24/1-115 ..... EWEHAVVYEDGQMLVG ..... DVPWE ..... MFVSKRMRVMSCEARGLSSNA .....  
 ZnIA26/1-139 ..... EWEHAVVYEDGQMLVG ..... DVPWE ..... MFVSKRMRVMSCEARGLSSNA .....  
 ZnIA10/1-269 ..... SKVDALKDQEVYLYEDKDDMLVG ..... DLPWD ..... YFISICRKLKIMRGSDAVGLAPRTVEQTGNK .....  
 ZnIA29/1-272 ..... SKVDALKDQEVYLYEDKDDMLVG ..... DLPWD ..... YFISICRKLKIMRGSDAVGLAPRTVEQTGNK .....  
 ZnIA21/1-244 ..... KDG ..... KDG ..... YVLYEDKDDMLVG ..... DVPWE ..... MFVSKRMRVMSCEARGLSSNA .....  
 ZnIA28/1-255 ..... KDG ..... KDG ..... YVLYEDKDDMLVG ..... DVPWDCHI ..... VFRSNCRMFAGS .....  
 ZnIA2/1-237 ..... VSGAD ..... VVVTYEDKDDMLVG ..... DVPWE ..... MFVSKRMRVMSCEARGLSSNA .....  
 ZnIA14/1-228 ..... AGDAD ..... VVVTYEDKDDMLVG ..... DVPWE ..... MFVSKRMRVMSCEARGLSSNA .....  
 ZnIA7/1-270 ..... LNS ..... EYVPTYE ..... KDG ..... DMLVG ..... DVPWE ..... MFVSKRMRVMSCEARGLSSNA .....  
 ZnIA5/1-220 ..... NS ..... EYVPTYE ..... KDG ..... DMLVG ..... DVPWKM ..... METCRRLRIMKGEAVNLAPRAAR .....  
 ZnIA27/1-186 ..... NS ..... EYVPTYE ..... KDG ..... DMLVG ..... DVPWKM ..... METCRRLRIMKGEAVNLAPRAAR .....  
 ZnIA22/1-231 ..... D ..... SAGT ..... WQIT ..... PAWS .....  
 ZnIA31/1-255 ..... D ..... SAGT ..... WQIT ..... PAWS .....  
 ZnIA19/1-198 ..... EY ..... MP ..... TYEDKDDMLVG ..... DVPWKM ..... VDCRKRIRLMKGEAVNLSPRTSSRQ

IV

Figure S1
