# Supplementary material for: The Maize (Zea mays L.) AUXIN/INDOLE-3-ACETIC ACID Gene Family: Phylogeny, Synteny, and Unique Root-Type and Tissue-Specific Expression Patterns during Development
Source: PubMed Central journal article supplement (PMC3815225; doi:10.1371/journal.pone.0078859), 2013-11-01
Supplement: pone.0078859.s003.pdf [file pone.0078859.s003.pdf]

**ZmlAA1**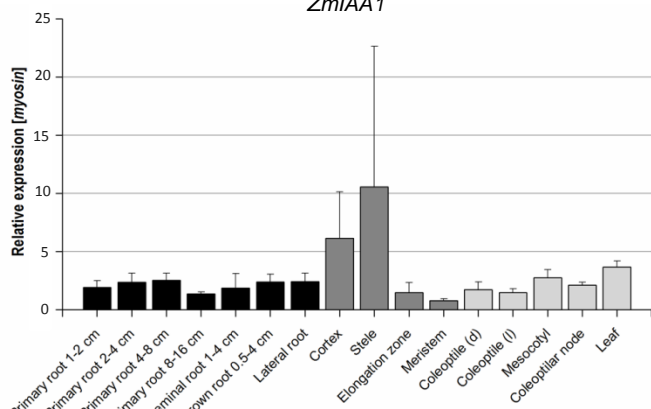**ZmlAA2**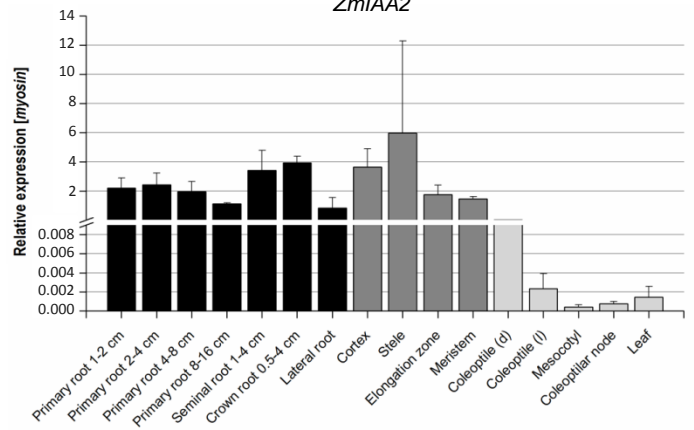**ZmlAA3**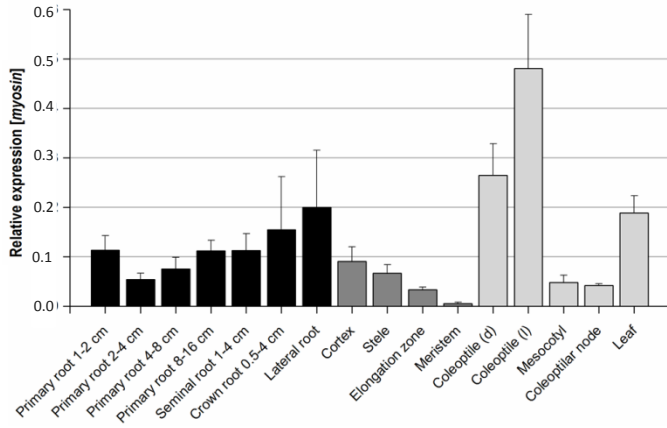**ZmlAA4**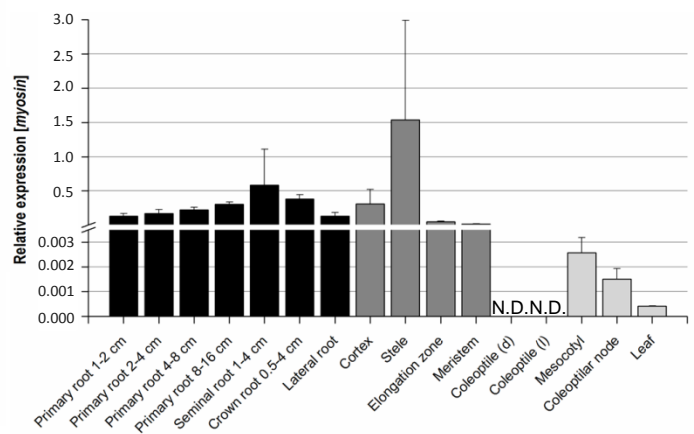**ZmlAA5**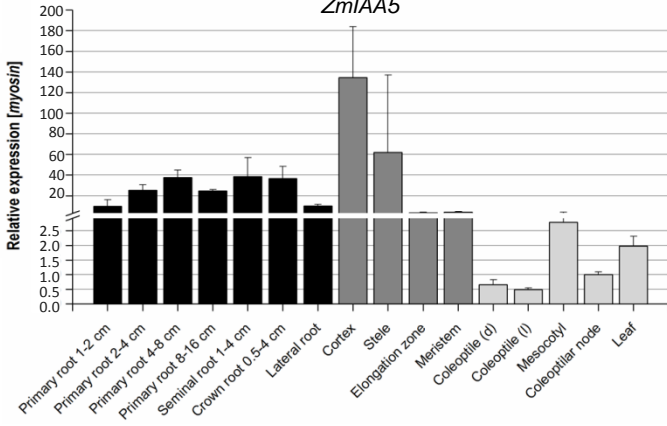**ZmlAA6**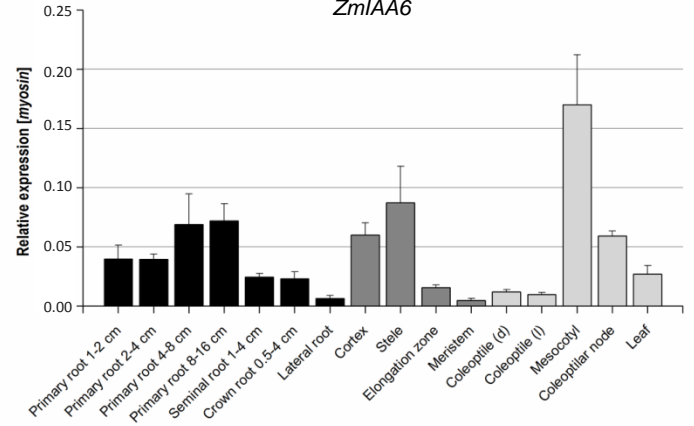**ZmlAA7**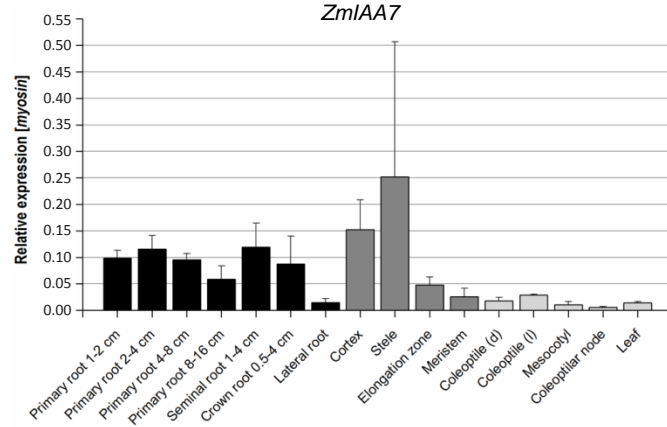**ZmlAA8**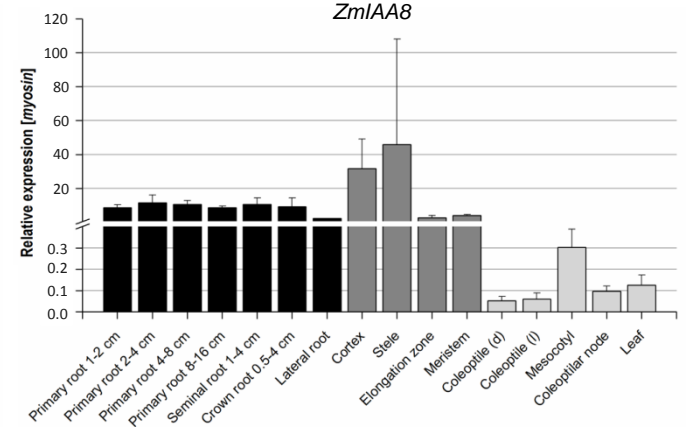

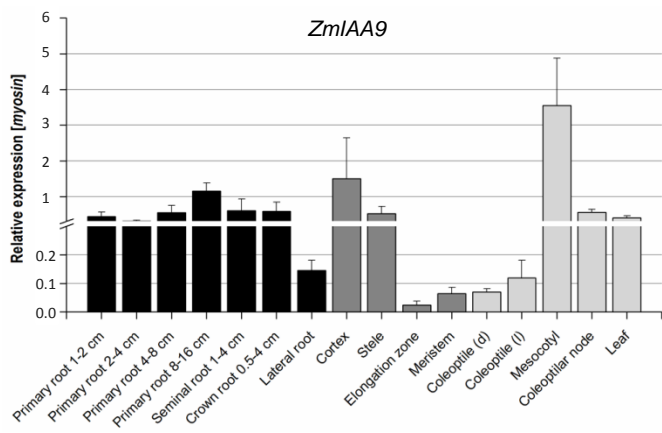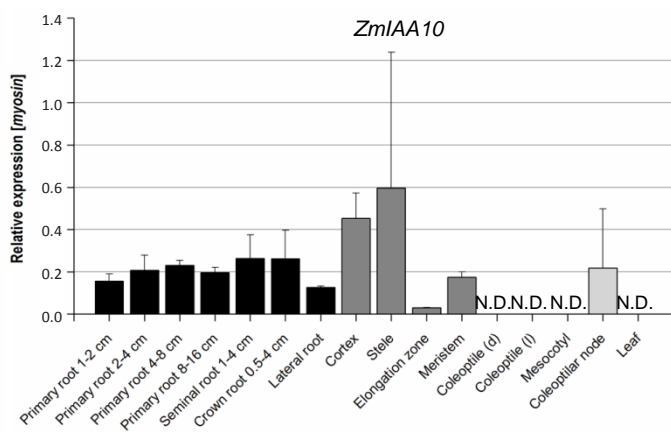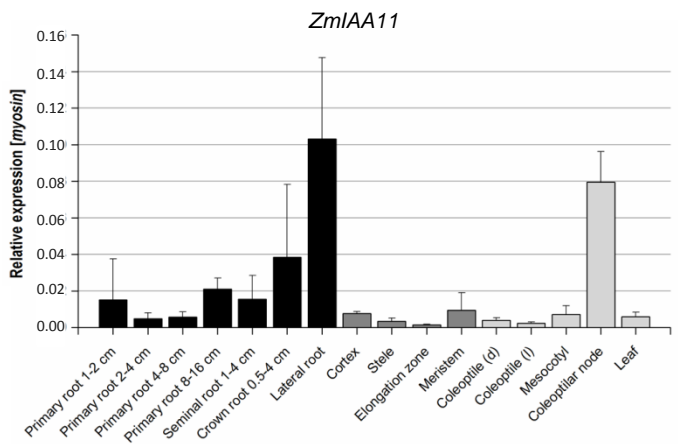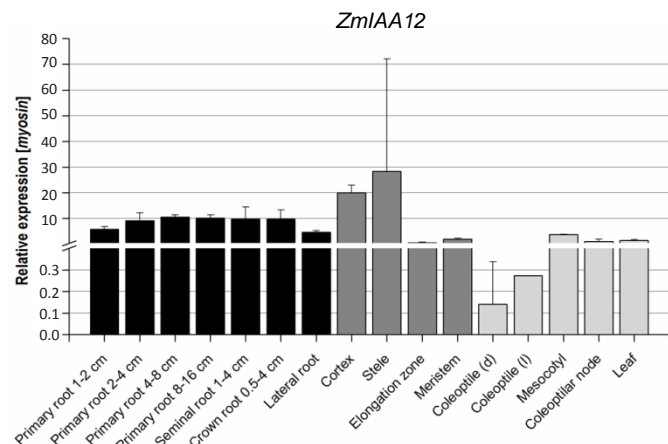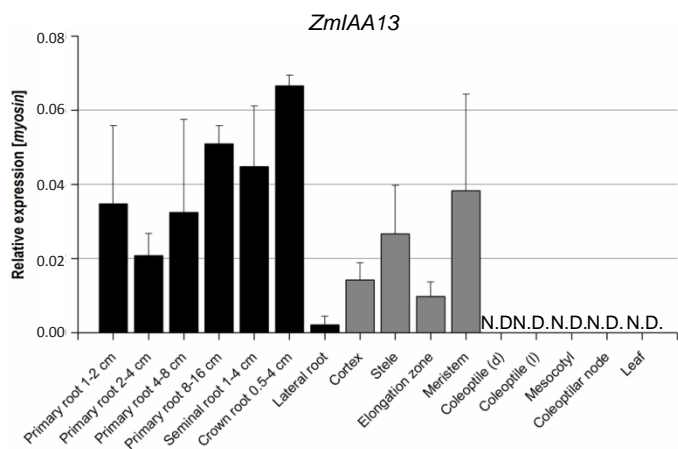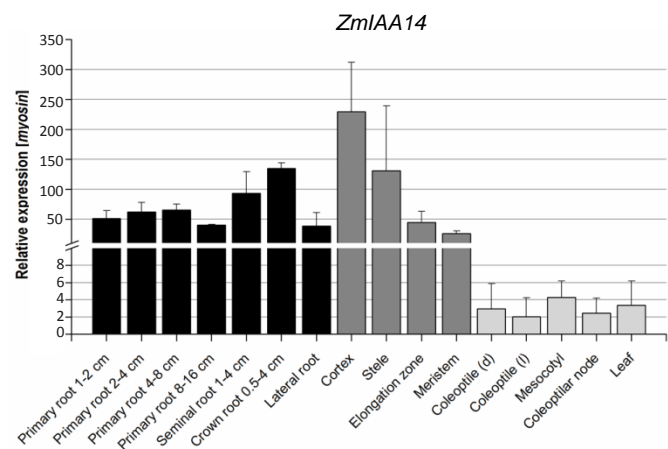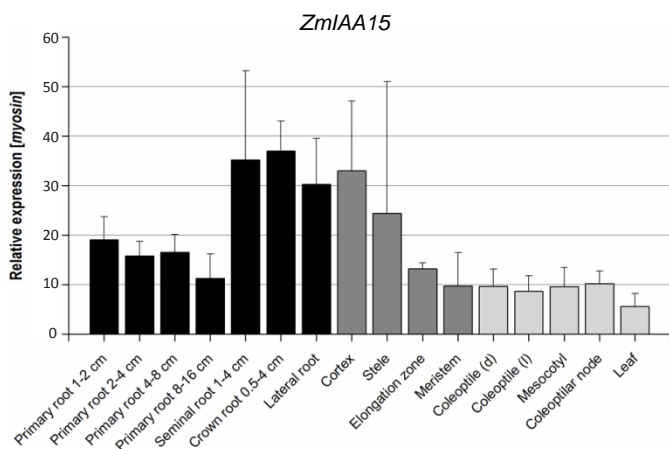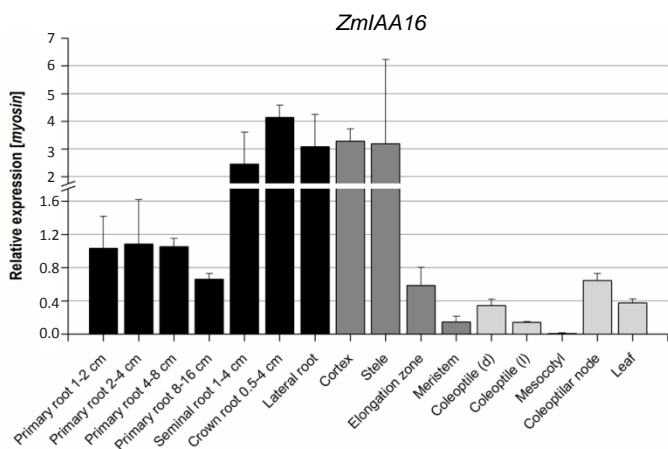

**ZmlAA17**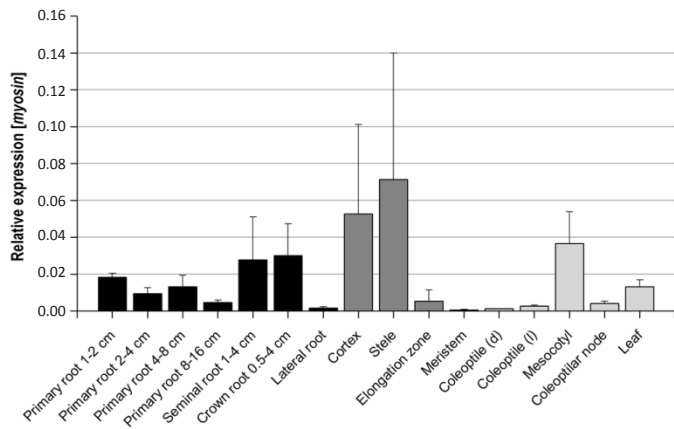**ZmlAA18**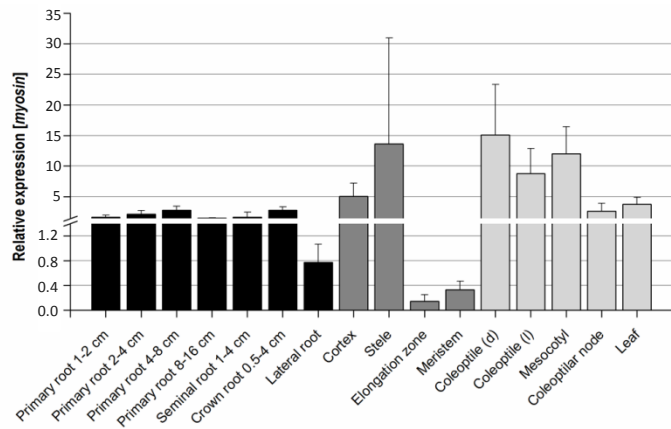**ZmlAA19**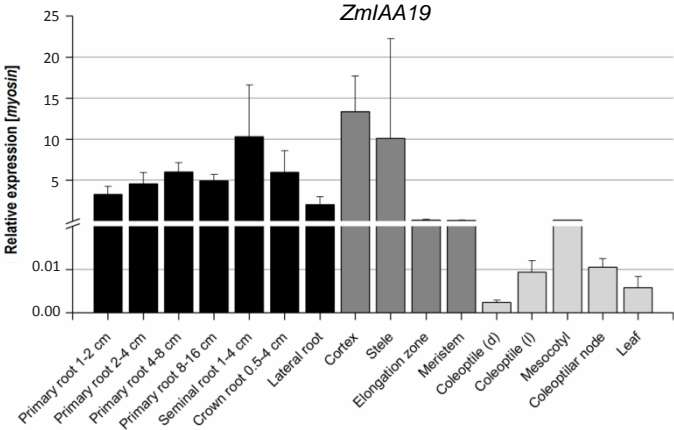**ZmlAA20**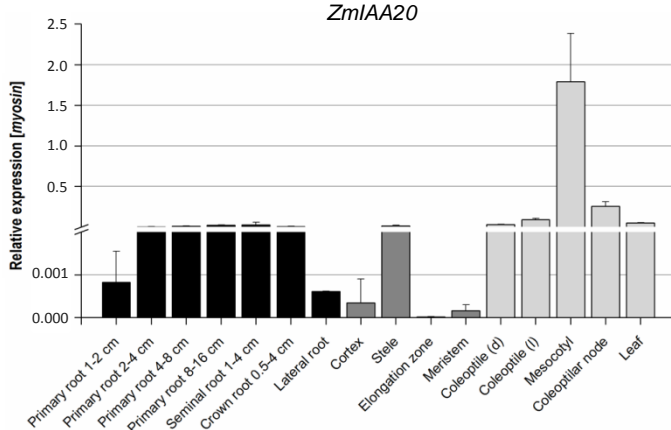**ZmlAA21**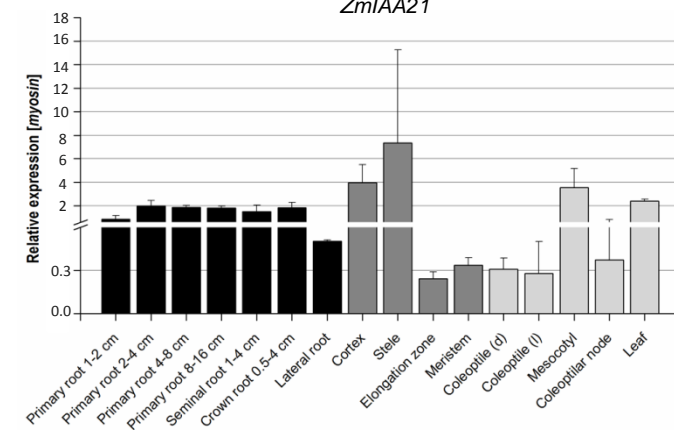**ZmlAA23**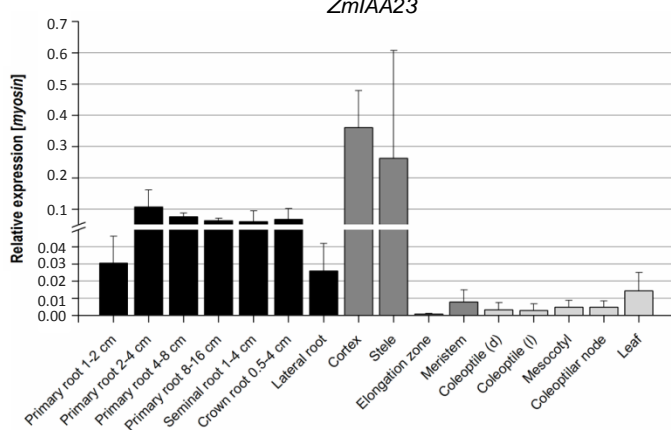**ZmlAA25**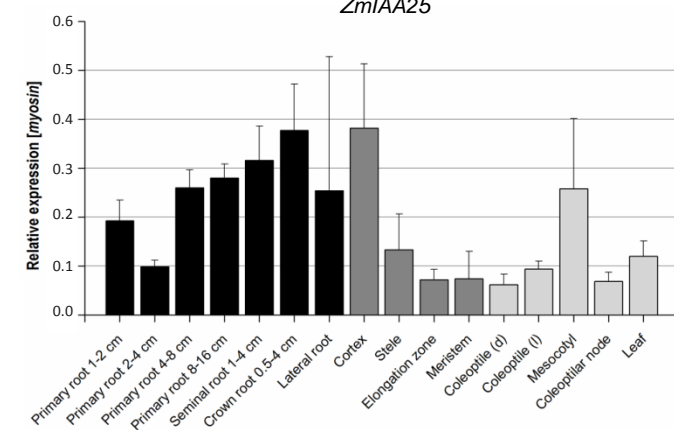**ZmlAA27**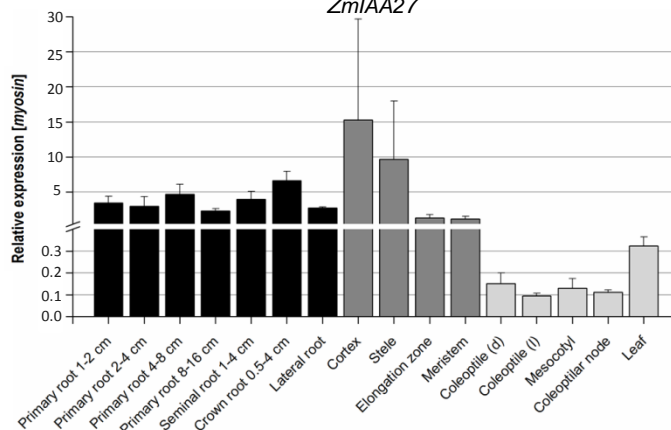

ZmIAA28

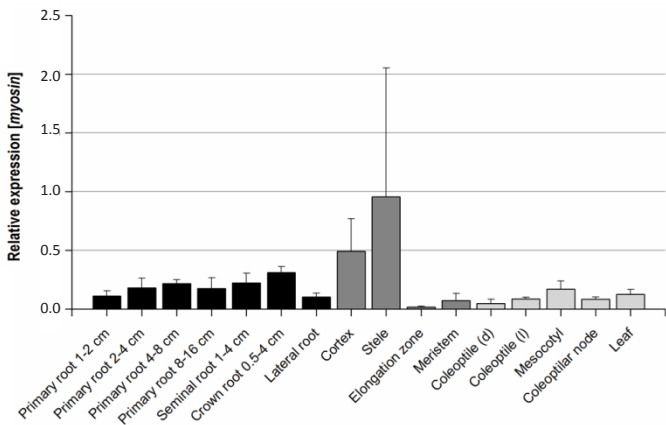

ZmIAA29

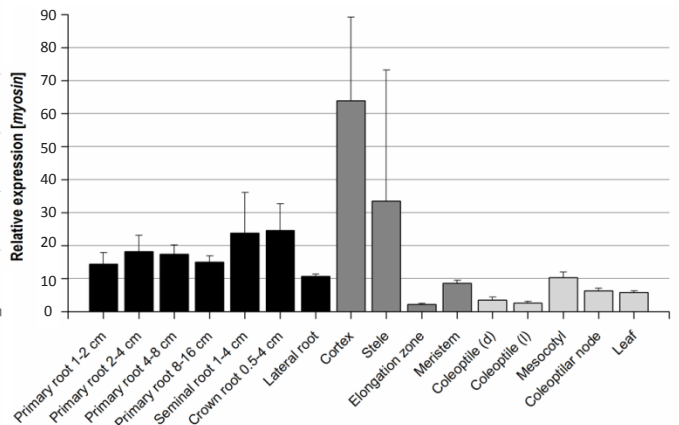

ZmIAA30

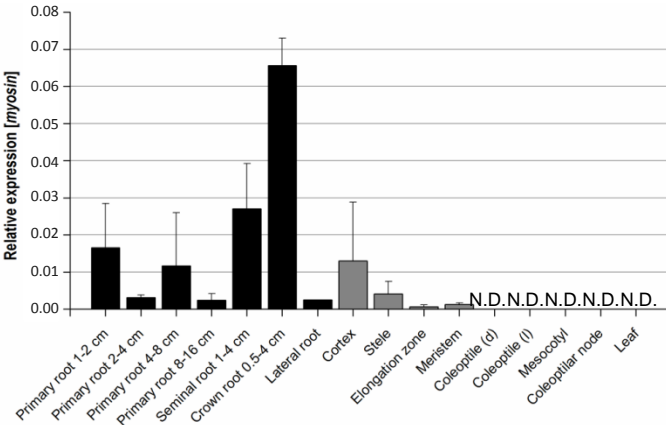

ZmIAA32

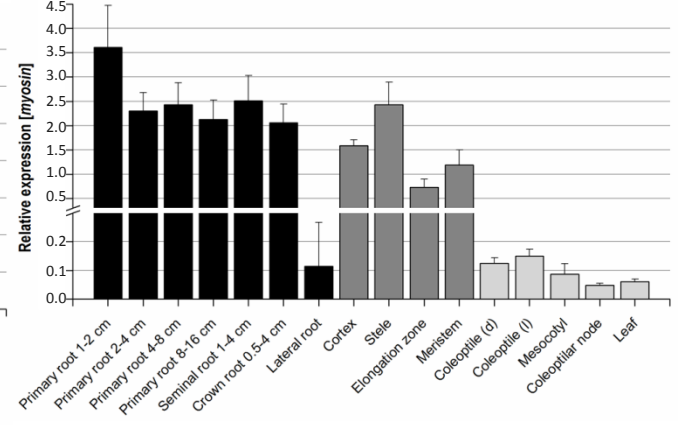

ZmIAA33

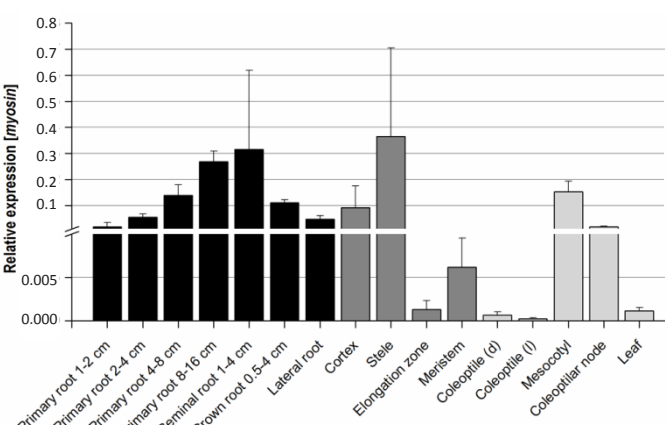

ZmIAA34

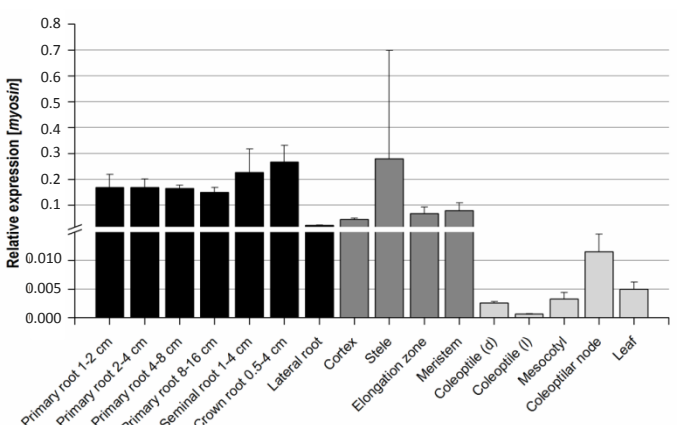

Figure S3
