# Supplementary material for: The Maize (Zea mays L.) AUXIN/INDOLE-3-ACETIC ACID Gene Family: Phylogeny, Synteny, and Unique Root-Type and Tissue-Specific Expression Patterns during Development
Source: PubMed Central journal article supplement (PMC3815225; doi:10.1371/journal.pone.0078859), 2013-11-01
Supplement: pone.0078859.s004.pdf [file pone.0078859.s004.pdf]

## ZmlAA1

| Primary root 1-2 cm | Primary root 2-4 cm | Primary root 4-8 cm | Primary root 8-16 cm | Seminal root 1-4 cm | Crown root 0.5-4 cm | Stele | Cortex | Elongation zone | Meristem | Lateral root | Coleoptile (d) | Coleoptile (l) | Mesocotyl | Coleopilar node | Leaf  |                      |
|---------------------|---------------------|---------------------|----------------------|---------------------|---------------------|-------|--------|-----------------|----------|--------------|----------------|----------------|-----------|-----------------|-------|----------------------|
| x                   | 0.404               | 0.35                | 0.195                | 0.911               | 0.211               | 0.258 | 0.138  | 0.264           | 0.049    | 0.361        | 0.312          | 0.131          | 0.208     | 0.518           | 0.013 | Primary root 1-2 cm  |
|                     | x                   | 0.638               | 0.103                | 0.537               | 0.936               | 0.275 | 0.113  | 0.254           | 0.03     | 0.894        | 0.263          | 0.164          | 0.592     | 0.625           | 0.122 | Primary root 2-4 cm  |
|                     |                     | x                   | 0.033                | 0.45                | 0.826               | 0.274 | 0.13   | 0.222           | 0.008    | 0.655        | 0.246          | 0.099          | 0.709     | 0.343           | 0.129 | Primary root 4-8 cm  |
|                     |                     |                     | x                    | 0.479               | 0.034               | 0.229 | 0.094  | 0.864           | 0.008    | 0.323        | 0.349          | 0.521          | 0.042     | 0.002           | 0.005 | Primary root 8-16 cm |
|                     |                     |                     |                      | x                   | 0.179               | 0.282 | 0.118  | 0.681           | 0.227    | 0.501        | 0.786          | 0.529          | 0.418     | 0.648           | 0.092 | Seminal root 1-4 cm  |
|                     |                     |                     |                      |                     | x                   | 0.289 | 0.158  | 0.213           | 0.028    | 0.685        | 0.044          | 0.022          | 0.633     | 0.269           | 0.066 | Crown root 0.5-4 cm  |
|                     |                     |                     |                      |                     |                     | x     | 0.576  | 0.223           | 0.199    | 0.392        | 0.257          | 0.236          | 0.265     | 0.263           | 0.33  | Stele                |
|                     |                     |                     |                      |                     |                     |       | x      | 0.139           | 0.075    | 0.477        | 0.117          | 0.109          | 0.227     | 0.137           | 0.353 | Cortex               |
|                     |                     |                     |                      |                     |                     |       |        | x               | 0.208    | 0.085        | 0.613          | 0.974          | 0.046     | 0.27            | 0.004 | Elongation zone      |
|                     |                     |                     |                      |                     |                     |       |        |                 | x        | 0.168        | 0.098          | 0.054          | 0.006     | 0.006           | 0.002 | Meristem             |
|                     |                     |                     |                      |                     |                     |       |        |                 |          | x            | 0.411          | 0.259          | 0.301     | 0.593           | 0.044 | Lateral root         |
|                     |                     |                     |                      |                     |                     |       |        |                 |          |              | x              | 0.335          | 0.202     | 0.242           | 0.02  | Coleoptile (d)       |
|                     |                     |                     |                      |                     |                     |       |        |                 |          |              |                | x              | 0.062     | 0.005           | 0.003 | Coleoptile (l)       |
|                     |                     |                     |                      |                     |                     |       |        |                 |          |              |                |                | x         | 0.25            | 0.033 | Mesocotyl            |
|                     |                     |                     |                      |                     |                     |       |        |                 |          |              |                |                |           | x               | 0.014 | Coleopilar node      |
|                     |                     |                     |                      |                     |                     |       |        |                 |          |              |                |                |           |                 | x     | Leaf                 |

|      |                |
|------|----------------|
|      | $p \leq 0.05$  |
|      | $p \leq 0.01$  |
|      | $p \leq 0.001$ |
| N.D. | not detectable |

## ZmlAA2

| Primary root 1-2 cm | Primary root 2-4 cm | Primary root 4-8 cm | Primary root 8-16 cm | Seminal root 1-4 cm | Crown root 0.5-4 cm | Stele | Cortex | Elongation zone | Meristem | Lateral root | Coleoptile (d) | Coleoptile (l) | Mesocotyl | Coleopilar node | Leaf  |                      |
|---------------------|---------------------|---------------------|----------------------|---------------------|---------------------|-------|--------|-----------------|----------|--------------|----------------|----------------|-----------|-----------------|-------|----------------------|
| x                   | 0.776               | 0.674               | 0.058                | 0.146               | 0.053               | 0.338 | 0.19   | 0.097           | 0.117    | 0.47         | 0.008          | 0.008          | 0.008     | 0.008           | 0.008 | Primary root 1-2 cm  |
|                     | x                   | 0.563               | 0.041                | 0.375               | 0.025               | 0.356 | 0.046  | 0.394           | 0.085    | 0.086        | 0.01           | 0.01           | 0.01      | 0.01            | 0.01  | Primary root 2-4 cm  |
|                     |                     | x                   | 0.116                | 0.124               | 0.016               | 0.267 | 0.159  | 0.676           | 0.294    | 0.486        | 0.011          | 0.011          | 0.011     | 0.011           | 0.011 | Primary root 4-8 cm  |
|                     |                     |                     | x                    | 0.044               | 1E-03               | 0.226 | 0.024  | 0.165           | 0.294    | 0.606        | 1E-04          | 1E-04          | 1E-04     | 1E-04           | 1E-04 | Primary root 8-16 cm |
|                     |                     |                     |                      | x                   | 0.525               | 0.531 | 0.831  | 0.115           | 0.078    | 0.141        | 0.015          | 0.015          | 0.015     | 0.015           | 0.015 | Seminal root 1-4 cm  |
|                     |                     |                     |                      |                     | x                   | 0.566 | 0.615  | 0.029           | 0.003    | 0.042        | 4E-04          | 4E-04          | 4E-04     | 4E-04           | 4E-04 | Crown root 0.5-4 cm  |
|                     |                     |                     |                      |                     |                     | x     | 0.561  | 0.271           | 0.247    | 0.385        | 0.156          | 0.156          | 0.156     | 0.156           | 0.156 | Stele                |
|                     |                     |                     |                      |                     |                     |       | x      | 0.13            | 0.041    | 0.205        | 0.01           | 0.01           | 0.01      | 0.01            | 0.01  | Cortex               |
|                     |                     |                     |                      |                     |                     |       |        | x               | 0.385    | 0.65         | 0.013          | 0.012          | 0.012     | 0.012           | 0.012 | Elongation zone      |
|                     |                     |                     |                      |                     |                     |       |        |                 | x        | 0.421        | 5E-04          | 4E-04          | 4E-04     | 4E-04           | 4E-04 | Meristem             |
|                     |                     |                     |                      |                     |                     |       |        |                 |          | x            | 0.354          | 0.349          | 0.349     | 0.349           | 0.349 | Lateral root         |
|                     |                     |                     |                      |                     |                     |       |        |                 |          |              | x              | 0.091          | 0.035     | 0.038           | 0.036 | Coleoptile (d)       |
|                     |                     |                     |                      |                     |                     |       |        |                 |          |              |                | x              | 0.11      | 0.167           | 0.52  | Coleoptile (l)       |
|                     |                     |                     |                      |                     |                     |       |        |                 |          |              |                |                | x         | 0.004           | 0.114 | Mesocotyl            |
|                     |                     |                     |                      |                     |                     |       |        |                 |          |              |                |                |           | x               | 0.214 | Coleopilar node      |
|                     |                     |                     |                      |                     |                     |       |        |                 |          |              |                |                |           |                 | x     | Leaf                 |

## ZmlAA3

| Primary root 1-2 cm | Primary root 2-4 cm | Primary root 4-8 cm | Primary root 8-16 cm | Seminal root 1-4 cm | Crown root 0.5-4 cm | Stele | Cortex | Elongation zone | Meristem | Lateral root | Coleoptile (d) | Coleoptile (l) | Mesocotyl | Coleopilar node | Leaf  |                      |
|---------------------|---------------------|---------------------|----------------------|---------------------|---------------------|-------|--------|-----------------|----------|--------------|----------------|----------------|-----------|-----------------|-------|----------------------|
| x                   | 0.034               | 0.153               | 0.964                | 0.986               | 0.464               | 0.042 | 0.25   | 0.01            | 0.006    | 0.481        | 0.039          | 0.008          | 0.009     | 0.021           | 0.08  | Primary root 1-2 cm  |
|                     | x                   | 0.297               | 0.018                | 0.082               | 0.126               | 0.42  | 0.051  | 0.016           | 0.006    | 0.301        | 0.011          | 0.004          | 0.583     | 0.204           | 0.008 | Primary root 2-4 cm  |
|                     |                     | x                   | 0.164                | 0.075               | 0.293               | 0.302 | 0.587  | 0.054           | 0.007    | 0.476        | 0.006          | 0.008          | 0.205     | 0.05            | 0.014 | Primary root 4-8 cm  |
|                     |                     |                     | x                    | 0.978               | 0.494               | 0.08  | 0.222  | 0.006           | 0.007    | 0.371        | 0.015          | 0.004          | 0.01      | 0.007           | 0.006 | Primary root 8-16 cm |
|                     |                     |                     |                      | x                   | 0.589               | 0.065 | 0.51   | 0.027           | 0.007    | 0.568        | 0.002          | 0.008          | 0.049     | 0.019           | 0.008 | Seminal root 1-4 cm  |
|                     |                     |                     |                      |                     | x                   | 0.23  | 0.233  | 0.099           | 0.071    | 0.298        | 0.283          | 0.015          | 0.134     | 0.134           | 0.645 | Crown root 0.5-4 cm  |
|                     |                     |                     |                      |                     |                     | x     | 0.331  | 0.042           | 0.004    | 0.417        | 0.008          | 0.007          | 0.187     | 0.049           | 0.011 | Stele                |
|                     |                     |                     |                      |                     |                     |       | x      | 0.02            | 0.013    | 0.292        | 0.028          | 0.003          | 0.029     | 0.056           | 0.027 | Cortex               |
|                     |                     |                     |                      |                     |                     |       |        | x               | 0.004    | 0.286        | 0.007          | 0.004          | 0.125     | 0.153           | 0.004 | Elongation zone      |
|                     |                     |                     |                      |                     |                     |       |        |                 | x        | 0.262        | 0.004          | 0.003          | 0.015     | 8E-05           | 0.002 | Meristem             |
|                     |                     |                     |                      |                     |                     |       |        |                 |          | x            | 0.361          | 0.088          | 0.294     | 0.31            | 0.983 | Lateral root         |
|                     |                     |                     |                      |                     |                     |       |        |                 |          |              | x              | 0.044          | 0.009     | 0.005           | 0.036 | Coleoptile (d)       |
|                     |                     |                     |                      |                     |                     |       |        |                 |          |              |                | x              | 0.003     | 0.004           | 0.008 | Coleoptile (l)       |
|                     |                     |                     |                      |                     |                     |       |        |                 |          |              |                |                | x         | 0.495           | 0.005 | Mesocotyl            |
|                     |                     |                     |                      |                     |                     |       |        |                 |          |              |                |                |           | x               | 0.003 | Coleopilar node      |
|                     |                     |                     |                      |                     |                     |       |        |                 |          |              |                |                |           |                 | x     | Leaf                 |

ZmlAA4

| Primary root 1-2 cm | Primary root 2-4 cm | Primary root 4-8 cm | Primary root 8-16 cm | Seminal root 1-4 cm | Crown root 0.5-4 cm | Stele | Cortex | Elongation zone | Meristem | Lateral root | Coleoptile (d) | Coleoptile (l) | Mesocotyl | Coleopilar node | Leaf  |                      |
|---------------------|---------------------|---------------------|----------------------|---------------------|---------------------|-------|--------|-----------------|----------|--------------|----------------|----------------|-----------|-----------------|-------|----------------------|
| x                   | 0.443               | 0.032               | 0.016                | 0.162               | 0.013               | 0.152 | 0.222  | 0.025           | 0.013    | 0.318        | N.D.           | 0.5            | 0.007     | 0.007           | 0.126 | Primary root 1-2 cm  |
|                     | x                   | 0.237               | 0.002                | 0.228               | 0.003               | 0.157 | 0.202  | 0.021           | 0.009    | 0.57         | N.D.           | 0.5            | 0.008     | 0.008           | 0.155 | Primary root 2-4 cm  |
|                     |                     | x                   | 0.078                | 0.253               | 0.045               | 0.175 | 0.431  | 8E-04           | 0.002    | 0.469        | N.D.           | 0.5            | 0.001     | 0.001           | 0.075 | Primary root 4-8 cm  |
|                     |                     |                     | x                    | 0.364               | 0.021               | 0.187 | 0.942  | 0.001           | 0.002    | 0.205        | N.D.           | 0.5            | 5E-04     | 5E-04           | 0.053 | Primary root 8-16 cm |
|                     |                     |                     |                      | x                   | 0.498               | 0.373 | 0.405  | 0.132           | 0.12     | 0.339        | N.D.           | 0.5            | 0.112     | 0.112           | 0.09  | Seminal root 1-4 cm  |
|                     |                     |                     |                      |                     | x                   | 0.204 | 0.54   | 0.003           | 0.001    | 0.129        | N.D.           | 0.5            | 0.002     | 0.001           | 0.035 | Crown root 0.5-4 cm  |
|                     |                     |                     |                      |                     |                     | x     | 0.22   | 0.135           | 0.126    | 0.283        | N.D.           | 0.5            | 0.125     | 0.125           | 0.277 | Stele                |
|                     |                     |                     |                      |                     |                     |       | x      | 0.082           | 0.068    | 0.637        | N.D.           | 0.5            | 0.061     | 0.06            | 0.43  | Cortex               |
|                     |                     |                     |                      |                     |                     |       |        | x               | 0.294    | 0.026        | N.D.           | 0.5            | 0.004     | 0.004           | 0.13  | Elongation zone      |
|                     |                     |                     |                      |                     |                     |       |        |                 | x        | 0.185        | N.D.           | 0.5            | 0.028     | 0.021           | 0.088 | Meristem             |
|                     |                     |                     |                      |                     |                     |       |        |                 |          | x            | N.D.           | 0.5            | 0.173     | 0.173           | 0.172 | Lateral root         |
|                     |                     |                     |                      |                     |                     |       |        |                 |          |              | x              | N.D.           | N.D.      | N.D.            | N.D.  | Coleoptile (d)       |
|                     |                     |                     |                      |                     |                     |       |        |                 |          |              |                | x              | 0.5       | 0.5             | 0.5   | Coleoptile (l)       |
|                     |                     |                     |                      |                     |                     |       |        |                 |          |              |                |                | x         | 0.078           | 0.09  | Mesocotyl            |
|                     |                     |                     |                      |                     |                     |       |        |                 |          |              |                |                |           | x               | 0.083 | Coleopilar node      |
|                     |                     |                     |                      |                     |                     |       |        |                 |          |              |                |                |           |                 | x     | Leaf                 |

|      |                |
|------|----------------|
|      | $p \leq 0.05$  |
|      | $p \leq 0.01$  |
|      | $p \leq 0.001$ |
| N.D. | not detectable |

ZmlAA5

| Primary root 1-2 cm | Primary root 2-4 cm | Primary root 4-8 cm | Primary root 8-16 cm | Seminal root 1-4 cm | Crown root 0.5-4 cm | Stele | Cortex | Elongation zone | Meristem | Lateral root | Coleoptile (d) | Coleoptile (l) | Mesocotyl | Coleopilar node | Leaf  |                      |
|---------------------|---------------------|---------------------|----------------------|---------------------|---------------------|-------|--------|-----------------|----------|--------------|----------------|----------------|-----------|-----------------|-------|----------------------|
| x                   | 0.018               | 0.019               | 0.024                | 0.091               | 0.009               | 0.249 | 0.016  | 0.142           | 0.152    | 0.316        | 0.07           | 0.062          | 0.109     | 0.072           | 0.092 | Primary root 1-2 cm  |
|                     | x                   | 0.039               | 0.893                | 0.232               | 0.071               | 0.422 | 0.017  | 0.004           | 0.004    | 0.272        | 0.003          | 0.003          | 0.005     | 0.003           | 0.004 | Primary root 2-4 cm  |
|                     |                     | x                   | 0.041                | 0.894               | 0.879               | 0.591 | 0.024  | 0.002           | 0.003    | 0.118        | 0.002          | 0.002          | 0.003     | 0.002           | 0.002 | Primary root 4-8 cm  |
|                     |                     |                     | x                    | 0.234               | 0.17                | 0.391 | 0.022  | 1E-04           | 0.003    | 0.015        | 3E-05          | 4E-05          | 4E-05     | 4E-05           | 3E-05 | Primary root 8-16 cm |
|                     |                     |                     |                      | x                   | 0.879               | 0.635 | 0.023  | 0.031           | 0.035    | 0.276        | 0.026          | 0.026          | 0.034     | 0.027           | 0.029 | Seminal root 1-4 cm  |
|                     |                     |                     |                      |                     | x                   | 0.575 | 0.019  | 0.012           | 0.011    | 0.247        | 0.01           | 0.009          | 0.011     | 0.01            | 0.011 | Crown root 0.5-4 cm  |
|                     |                     |                     |                      |                     |                     | x     | 0.323  | 0.217           | 0.221    | 0.468        | 0.202          | 0.2            | 0.21      | 0.203           | 0.207 | Stele                |
|                     |                     |                     |                      |                     |                     |       | x      | 0.013           | 0.013    | 0.306        | 0.012          | 0.012          | 0.013     | 0.012           | 0.013 | Cortex               |
|                     |                     |                     |                      |                     |                     |       |        | x               | 0.129    | 0.096        | 0.003          | 0.001          | 0.434     | 0.003           | 0.019 | Elongation zone      |
|                     |                     |                     |                      |                     |                     |       |        |                 | x        | 0.149        | 0.003          | 0.001          | 0.107     | 0.002           | 0.007 | Meristem             |
|                     |                     |                     |                      |                     |                     |       |        |                 |          | x            | 0.067          | 0.066          | 0.037     | 0.064           | 0.053 | Lateral root         |
|                     |                     |                     |                      |                     |                     |       |        |                 |          |              | x              | 0.193          | 0.034     | 0.039           | 0.007 | Coleoptile (d)       |
|                     |                     |                     |                      |                     |                     |       |        |                 |          |              |                | x              | 0.026     | 8E-04           | 0.002 | Coleoptile (l)       |
|                     |                     |                     |                      |                     |                     |       |        |                 |          |              |                |                | x         | 0.043           | 0.161 | Mesocotyl            |
|                     |                     |                     |                      |                     |                     |       |        |                 |          |              |                |                |           | x               | 0.004 | Coleopilar node      |
|                     |                     |                     |                      |                     |                     |       |        |                 |          |              |                |                |           |                 | x     | Leaf                 |

ZmlAA6

| Primary root 1-2 cm | Primary root 2-4 cm | Primary root 4-8 cm | Primary root 8-16 cm | Seminal root 1-4 cm | Crown root 0.5-4 cm | Stele | Cortex | Elongation zone | Meristem | Lateral root | Coleoptile (d) | Coleoptile (l) | Mesocotyl | Coleopilar node | Leaf  |                      |
|---------------------|---------------------|---------------------|----------------------|---------------------|---------------------|-------|--------|-----------------|----------|--------------|----------------|----------------|-----------|-----------------|-------|----------------------|
| x                   | 0.938               | 0.204               | 0.003                | 0.101               | 0.141               | 0.086 | 0.274  | 0.026           | 0.008    | 0.197        | 0.016          | 0.017          | 0.01      | 0.082           | 0.178 | Primary root 1-2 cm  |
|                     | x                   | 0.126               | 0.024                | 0.017               | 0.042               | 0.069 | 0.001  | 3E-04           | 0.054    | 0.054        | 4E-04          | 0.002          | 0.011     | 0.004           | 0.064 | Primary root 2-4 cm  |
|                     |                     | x                   | 0.886                | 0.032               | 0.026               | 0.442 | 0.937  | 0.025           | 0.018    | 0.275        | 0.025          | 0.017          | 0.011     | 0.459           | 0.058 | Primary root 4-8 cm  |
|                     |                     |                     | x                    | 0.008               | 0.014               | 0.52  | 0.442  | 0.004           | 0.018    | 0.081        | 0.004          | 0.004          | 0.021     | 0.234           | 0.021 | Primary root 8-16 cm |
|                     |                     |                     |                      | x                   | 0.664               | 0.03  | 0.012  | 0.005           | 0.003    | 0.179        | 0.015          | 0.002          | 0.006     | 2E-04           | 0.624 | Seminal root 1-4 cm  |
|                     |                     |                     |                      |                     | x                   | 0.02  | 0.006  | 0.065           | 0.01     | 0.286        | 0.037          | 0.02           | 0.007     | 4E-05           | 0.491 | Crown root 0.5-4 cm  |
|                     |                     |                     |                      |                     |                     | x     | 0.186  | 0.02            | 0.012    | 0.07         | 0.014          | 0.015          | 0.091     | 0.153           | 0.02  | Stele                |
|                     |                     |                     |                      |                     |                     |       | x      | 0.011           | 0.013    | 0.138        | 0.017          | 0.012          | 0.009     | 0.858           | 0.075 | Cortex               |
|                     |                     |                     |                      |                     |                     |       |        | x               | 0.004    | 0.241        | 0.104          | 0.04           | 0.006     | 1E-04           | 0.09  | Elongation zone      |
|                     |                     |                     |                      |                     |                     |       |        |                 | x        | 0.64         | 4E-04          | 0.051          | 0.005     | 2E-04           | 0.008 | Meristem             |
|                     |                     |                     |                      |                     |                     |       |        |                 |          | x            | 0.101          | 0.39           | 0.01      | 0.081           | 0.029 | Lateral root         |
|                     |                     |                     |                      |                     |                     |       |        |                 |          |              | x              | 0.301          | 0.006     | 3E-04           | 0.017 | Coleoptile (d)       |
|                     |                     |                     |                      |                     |                     |       |        |                 |          |              |                | x              | 0.004     | 2E-04           | 0.015 | Coleoptile (l)       |
|                     |                     |                     |                      |                     |                     |       |        |                 |          |              |                |                | x         | 0.015           | 0.007 | Mesocotyl            |
|                     |                     |                     |                      |                     |                     |       |        |                 |          |              |                |                |           | x               | 0.006 | Coleopilar node      |
|                     |                     |                     |                      |                     |                     |       |        |                 |          |              |                |                |           |                 | x     | Leaf                 |

ZmlAA7

| Primary root 1-2 cm | Primary root 2-4 cm | Primary root 4-8 cm | Primary root 8-16 cm | Seminal root 1-4 cm | Crown root 0.5-4 cm | Stele | Cortex | Elongation zone | Meristem | Lateral root | Coleoptile (d) | Coleoptile (l) | Mesocotyl | Coleoptilar node | Leaf  |                      |
|---------------------|---------------------|---------------------|----------------------|---------------------|---------------------|-------|--------|-----------------|----------|--------------|----------------|----------------|-----------|------------------|-------|----------------------|
| x                   | 0.417               | 0.127               | 0.034                | 0.333               | 0.708               | 0.325 | 0.129  | 0.019           | 0.007    | 0.058        | 0.003          | 0.004          | 0.003     | 0.001            | 0.002 | Primary root 1-2 cm  |
|                     | x                   | 0.326               | 0.043                | 0.921               | 0.304               | 0.359 | 0.252  | 0.005           | 0.008    | 0.108        | 0.003          | 0.006          | 0.002     | 0.003            | 0.004 | Primary root 2-4 cm  |
|                     |                     | x                   | 0.044                | 0.294               | 0.78                | 0.317 | 0.116  | 0.019           | 0.006    | 0.062        | 0.002          | 0.002          | 0.002     | 6E-04            | 0.001 | Primary root 4-8 cm  |
|                     |                     |                     | x                    | 0.114               | 0.389               | 0.218 | 0.039  | 0.28            | 0.006    | 0.047        | 0.036          | 0.104          | 0.032     | 0.021            | 0.033 | Primary root 8-16 cm |
|                     |                     |                     |                      | x                   | 0.463               | 0.412 | 0.434  | 0.089           | 0.039    | 0.029        | 0.029          | 0.031          | 0.023     | 0.016            | 0.02  | Seminal root 1-4 cm  |
|                     |                     |                     |                      |                     | x                   | 0.349 | 0.007  | 0.215           | 0.145    | 0.473        | 0.076          | 0.116          | 0.063     | 0.055            | 0.072 | Crown root 0.5-4 cm  |
|                     |                     |                     |                      |                     |                     | x     | 0.551  | 0.199           | 0.158    | 0.363        | 0.159          | 0.176          | 0.151     | 0.147            | 0.156 | Stele                |
|                     |                     |                     |                      |                     |                     |       | x      | 0.029           | 0.029    | 0.29         | 0.017          | 0.023          | 0.016     | 0.014            | 0.017 | Cortex               |
|                     |                     |                     |                      |                     |                     |       |        | x               | 0.046    | 0.116        | 0.008          | 0.087          | 0.009     | 0.01             | 0.016 | Elongation zone      |
|                     |                     |                     |                      |                     |                     |       |        |                 | x        | 0.222        | 0.289          | 0.741          | 0.118     | 0.064            | 0.17  | Meristem             |
|                     |                     |                     |                      |                     |                     |       |        |                 |          | x            | 0.352          | 0.158          | 0.892     | 0.277            | 0.836 | Lateral root         |
|                     |                     |                     |                      |                     |                     |       |        |                 |          |              | x              | 0.031          | 0.016     | 0.022            | 0.211 | Coleoptile (d)       |
|                     |                     |                     |                      |                     |                     |       |        |                 |          |              |                | x              | 0.003     | 3E-04            | 0.001 | Coleoptile (l)       |
|                     |                     |                     |                      |                     |                     |       |        |                 |          |              |                |                | x         | 0.131            | 0.251 | Mesocotyl            |
|                     |                     |                     |                      |                     |                     |       |        |                 |          |              |                |                |           | x                | 5E-04 | Coleoptilar node     |
|                     |                     |                     |                      |                     |                     |       |        |                 |          |              |                |                |           |                  | x     | Leaf                 |

|      |                |
|------|----------------|
|      | $p \leq 0.05$  |
|      | $p \leq 0.01$  |
|      | $p \leq 0.001$ |
| N.D. | not detectable |

ZmlAA8

| Primary root 1-2 cm | Primary root 2-4 cm | Primary root 4-8 cm | Primary root 8-16 cm | Seminal root 1-4 cm | Crown root 0.5-4 cm | Stele | Cortex | Elongation zone | Meristem | Lateral root | Coleoptile (d) | Coleoptile (l) | Mesocotyl | Coleoptilar node | Leaf  |                      |
|---------------------|---------------------|---------------------|----------------------|---------------------|---------------------|-------|--------|-----------------|----------|--------------|----------------|----------------|-----------|------------------|-------|----------------------|
| x                   | 0.354               | 0.319               | 0.988                | 0.439               | 0.874               | 0.309 | 0.079  | 0.022           | 0.007    | 0.146        | 0.002          | 0.002          | 0.002     | 0.002            | 0.002 | Primary root 1-2 cm  |
|                     | x                   | 0.786               | 0.228                | 0.812               | 0.014               | 0.357 | 0.061  | 0.029           | 0.052    | 0.203        | 0.015          | 0.015          | 0.016     | 0.015            | 0.015 | Primary root 2-4 cm  |
|                     |                     | x                   | 0.238                | 0.973               | 0.708               | 0.348 | 0.116  | 0.005           | 0.013    | 0.022        | 0.003          | 0.003          | 0.003     | 0.003            | 0.003 | Primary root 4-8 cm  |
|                     |                     |                     | x                    | 0.436               | 0.839               | 0.32  | 0.074  | 0.003           | 0.013    | 0.075        | 3E-04          | 3E-04          | 4E-04     | 3E-04            | 3E-04 | Primary root 8-16 cm |
|                     |                     |                     |                      | x                   | 0.758               | 0.354 | 0.117  | 0.016           | 0.049    | 0.002        | 0.012          | 0.012          | 0.013     | 0.012            | 0.012 | Seminal root 1-4 cm  |
|                     |                     |                     |                      |                     | x                   | 0.328 | 0.045  | 0.093           | 0.159    | 0.251        | 0.041          | 0.042          | 0.044     | 0.042            | 0.042 | Crown root 0.5-4 cm  |
|                     |                     |                     |                      |                     |                     | x     | 0.701  | 0.267           | 0.268    | 0.429        | 0.238          | 0.238          | 0.24      | 0.238            | 0.238 | Stele                |
|                     |                     |                     |                      |                     |                     |       | x      | 0.043           | 0.053    | 0.222        | 0.036          | 0.036          | 0.037     | 0.036            | 0.036 | Cortex               |
|                     |                     |                     |                      |                     |                     |       |        | x               | 0.253    | 0.94         | 0.026          | 0.028          | 0.035     | 0.029            | 0.031 | Elongation zone      |
|                     |                     |                     |                      |                     |                     |       |        |                 | x        | 0.213        | 1E-03          | 9E-04          | 0.001     | 8E-04            | 8E-04 | Meristem             |
|                     |                     |                     |                      |                     |                     |       |        |                 |          | x            | 0.01           | 0.018          | 0.021     | 0.022            | 0.029 | Lateral root         |
|                     |                     |                     |                      |                     |                     |       |        |                 |          |              | x              | 0.6            | 0.017     | 0.11             | 0.086 | Coleoptile (d)       |
|                     |                     |                     |                      |                     |                     |       |        |                 |          |              |                | x              | 0.022     | 0.086            | 0.038 | Coleoptile (l)       |
|                     |                     |                     |                      |                     |                     |       |        |                 |          |              |                |                | x         | 0.018            | 0.042 | Mesocotyl            |
|                     |                     |                     |                      |                     |                     |       |        |                 |          |              |                |                |           | x                | 0.103 | Coleoptilar node     |
|                     |                     |                     |                      |                     |                     |       |        |                 |          |              |                |                |           |                  | x     | Leaf                 |

ZmlAA9

| Primary root 1-2 cm | Primary root 2-4 cm | Primary root 4-8 cm | Primary root 8-16 cm | Seminal root 1-4 cm | Crown root 0.5-4 cm | Stele | Cortex | Elongation zone | Meristem | Lateral root | Coleoptile (d) | Coleoptile (l) | Mesocotyl | Coleoptilar node | Leaf  |                      |
|---------------------|---------------------|---------------------|----------------------|---------------------|---------------------|-------|--------|-----------------|----------|--------------|----------------|----------------|-----------|------------------|-------|----------------------|
| x                   | 0.137               | 0.472               | 0.02                 | 0.437               | 0.447               | 0.204 | 0.141  | 0.006           | 0.007    | 0.17         | 0.01           | 0.005          | 0.015     | 0.298            | 0.711 | Primary root 1-2 cm  |
|                     | x                   | 0.128               | 0.005                | 0.181               | 0.139               | 0.131 | 0.128  | 1E-04           | 5E-04    | 0.018        | 6E-04          | 0.005          | 0.016     | 0.013            | 0.081 | Primary root 2-4 cm  |
|                     |                     | x                   | 0.041                | 0.746               | 0.796               | 0.859 | 0.23   | 0.014           | 0.017    | 0.33         | 0.016          | 0.033          | 0.028     | 0.895            | 0.264 | Primary root 4-8 cm  |
|                     |                     |                     | x                    | 0.024               | 0.077               | 0.035 | 0.574  | 0.002           | 0.017    | 0.132        | 0.003          | 0.005          | 0.041     | 0.018            | 0.004 | Primary root 8-16 cm |
|                     |                     |                     |                      | x                   | 0.929               | 0.647 | 0.189  | 0.038           | 0.044    | 0.082        | 0.047          | 0.078          | 0.031     | 0.809            | 0.293 | Seminal root 1-4 cm  |
|                     |                     |                     |                      |                     | x                   | 0.781 | 0.279  | 0.024           | 0.031    | 0.201        | 0.027          | 0.037          | 0.025     | 0.842            | 0.251 | Crown root 0.5-4 cm  |
|                     |                     |                     |                      |                     |                     | x     | 0.145  | 0.013           | 0.015    | 0.237        | 0.02           | 0.02           | 0.017     | 0.781            | 0.422 | Stele                |
|                     |                     |                     |                      |                     |                     |       | x      | 0.08            | 0.084    | 0.472        | 0.088          | 0.092          | 0.043     | 0.222            | 0.158 | Cortex               |
|                     |                     |                     |                      |                     |                     |       |        | x               | 0.004    | 0.146        | 0.006          | 0.034          | 0.013     | 0.001            | 0.002 | Elongation zone      |
|                     |                     |                     |                      |                     |                     |       |        |                 | x        | 0.22         | 0.602          | 0.123          | 0.013     | 0.002            | 0.004 | Meristem             |
|                     |                     |                     |                      |                     |                     |       |        |                 |          | x            | 0.296          | 0.738          | 0.087     | 0.079            | 0.042 | Lateral root         |
|                     |                     |                     |                      |                     |                     |       |        |                 |          |              | x              | 0.182          | 0.013     | 9E-04            | 0.002 | Coleoptile (d)       |
|                     |                     |                     |                      |                     |                     |       |        |                 |          |              |                | x              | 0.012     | 0.004            | 0.016 | Coleoptile (l)       |
|                     |                     |                     |                      |                     |                     |       |        |                 |          |              |                |                | x         | 0.022            | 0.019 | Mesocotyl            |
|                     |                     |                     |                      |                     |                     |       |        |                 |          |              |                |                |           | x                | 0.018 | Coleoptilar node     |
|                     |                     |                     |                      |                     |                     |       |        |                 |          |              |                |                |           |                  | x     | Leaf                 |

## ZmlAA10

| Primary root 1-2 cm | Primary root 2-4 cm | Primary root 4-8 cm | Primary root 8-16 cm | Seminal root 1-4 cm | Crown root 0.5-4 cm | Stele | Cortex | Elongation zone | Meristem | Lateral root | Coleoptile (d) | Coleoptile (l) | Mesocotyl | Coleoptilar node | Leaf |                      |
|---------------------|---------------------|---------------------|----------------------|---------------------|---------------------|-------|--------|-----------------|----------|--------------|----------------|----------------|-----------|------------------|------|----------------------|
| x                   | 0.357               | 0.001               | 0.231                | 0.074               | 0.272               | 0.277 | 0.01   | 0.005           | 0.056    | 0.752        | N.D.           | N.D.           | N.D.      | 0.718            | N.D. | Primary root 1-2 cm  |
|                     | x                   | 0.645               | 0.67                 | 0.536               | 0.203               | 0.329 | 0.03   | 0.015           | 0.564    | 0.337        | N.D.           | N.D.           | N.D.      | 0.979            | N.D. | Primary root 2-4 cm  |
|                     |                     | x                   | 0.235                | 0.513               | 0.703               | 0.344 | 0.027  | 5E-04           | 0.002    | 0.076        | N.D.           | N.D.           | N.D.      | 0.97             | N.D. | Primary root 4-8 cm  |
|                     |                     |                     | x                    | 0.376               | 0.32                | 0.305 | 0.024  | 8E-04           | 0.002    | 0.132        | N.D.           | N.D.           | N.D.      | 0.91             | N.D. | Primary root 8-16 cm |
|                     |                     |                     |                      | x                   | 0.991               | 0.423 | 0.023  | 0.026           | 0.381    | 0.008        | N.D.           | N.D.           | N.D.      | 0.949            | N.D. | Seminal root 1-4 cm  |
|                     |                     |                     |                      |                     | x                   | 0.401 | 0.11   | 0.041           | 0.347    | 0.336        | N.D.           | N.D.           | N.D.      | 0.461            | N.D. | Crown root 0.5-4 cm  |
|                     |                     |                     |                      |                     |                     | x     | 0.732  | 0.006           | 0.339    | 0.42         | N.D.           | N.D.           | N.D.      | 0.459            | N.D. | Stele                |
|                     |                     |                     |                      |                     |                     |       | x      | 0.006           | 0.071    | 0.244        | N.D.           | N.D.           | N.D.      | 0.257            | N.D. | Cortex               |
|                     |                     |                     |                      |                     |                     |       |        | x               | 0.011    | 0.034        | N.D.           | N.D.           | N.D.      | 0.365            | N.D. | Elongation zone      |
|                     |                     |                     |                      |                     |                     |       |        |                 | x        | 0.115        | N.D.           | N.D.           | N.D.      | 0.818            | N.D. | Meristem             |
|                     |                     |                     |                      |                     |                     |       |        |                 |          | x            | N.D.           | N.D.           | N.D.      | 0.684            | N.D. | Lateral root         |
|                     |                     |                     |                      |                     |                     |       |        |                 |          |              | x              | N.D.           | N.D.      | N.D.             | N.D. | Coleoptile (d)       |
|                     |                     |                     |                      |                     |                     |       |        |                 |          |              |                | x              | N.D.      | N.D.             | N.D. | Coleoptile (l)       |
|                     |                     |                     |                      |                     |                     |       |        |                 |          |              |                |                | x         | N.D.             | N.D. | Mesocotyl            |
|                     |                     |                     |                      |                     |                     |       |        |                 |          |              |                |                |           | x                | N.D. | Coleoptilar node     |
|                     |                     |                     |                      |                     |                     |       |        |                 |          |              |                |                |           |                  | x    | Leaf                 |

|      |                |
|------|----------------|
|      | $p \leq 0.05$  |
|      | $p \leq 0.01$  |
|      | $p \leq 0.001$ |
| N.D. | not detectable |

## ZmlAA11

| Primary root 1-2 cm | Primary root 2-4 cm | Primary root 4-8 cm | Primary root 8-16 cm | Seminal root 1-4 cm | Crown root 0.5-4 cm | Stele | Cortex | Elongation zone | Meristem | Lateral root | Coleoptile (d) | Coleoptile (l) | Mesocotyl | Coleoptilar node | Leaf  |                      |
|---------------------|---------------------|---------------------|----------------------|---------------------|---------------------|-------|--------|-----------------|----------|--------------|----------------|----------------|-----------|------------------|-------|----------------------|
| x                   | 0.439               | 0.457               | 0.636                | 0.986               | 0.096               | 0.352 | 0.523  | 0.326           | 0.695    | 0.189        | 0.377          | 0.322          | 0.503     | 0.001            | 0.429 | Primary root 1-2 cm  |
|                     | x                   | 0.949               | 0.008                | 0.406               | 0.241               | 0.662 | 0.534  | 0.249           | 0.493    | 0.215        | 0.623          | 0.329          | 0.882     | 0.03             | 0.595 | Primary root 2-4 cm  |
|                     |                     | x                   | 0.04                 | 0.265               | 0.196               | 0.331 | 0.043  | 0.071           | 0.572    | 0.198        | 0.094          | 0.07           | 0.314     | 0.003            | 0.996 | Primary root 4-8 cm  |
|                     |                     |                     | x                    | 0.484               | 0.43                | 0.007 | 0.038  | 0.002           | 0.572    | 0.241        | 0.018          | 0.009          | 0.079     | 0.009            | 0.008 | Primary root 8-16 cm |
|                     |                     |                     |                      | x                   | 0.418               | 0.313 | 0.538  | 0.266           | 0.097    | 0.136        | 0.198          | 0.148          | 0.364     | 0.013            | 0.22  | Seminal root 1-4 cm  |
|                     |                     |                     |                      |                     | x                   | 0.216 | 0.373  | 0.208           | 0.288    | 0.31         | 0.175          | 0.161          | 0.202     | 0.064            | 0.187 | Crown root 0.5-4 cm  |
|                     |                     |                     |                      |                     |                     | x     | 0.24   | 0.134           | 0.352    | 0.186        | 0.854          | 0.44           | 0.387     | 0.02             | 0.008 | Stele                |
|                     |                     |                     |                      |                     |                     |       | x      | 0.103           | 0.618    | 0.207        | 0.024          | 0.035          | 0.033     | 0.058            | 0.648 | Cortex               |
|                     |                     |                     |                      |                     |                     |       |        | x               | 0.274    | 0.189        | 0.107          | 0.178          | 0.212     | 0.022            | 0.032 | Elongation zone      |
|                     |                     |                     |                      |                     |                     |       |        |                 | x        | 0.156        | 0.388          | 0.256          | 0.753     | 0.008            | 0.463 | Meristem             |
|                     |                     |                     |                      |                     |                     |       |        |                 |          | x            | 0.197          | 0.195          | 0.197     | 0.412            | 0.189 | Lateral root         |
|                     |                     |                     |                      |                     |                     |       |        |                 |          |              | x              | 0.052          | 0.164     | 0.002            | 0.35  | Coleoptile (d)       |
|                     |                     |                     |                      |                     |                     |       |        |                 |          |              |                | x              | 0.121     | 0.003            | 0.073 | Coleoptile (l)       |
|                     |                     |                     |                      |                     |                     |       |        |                 |          |              |                |                | x         | 0.002            | 0.689 | Mesocotyl            |
|                     |                     |                     |                      |                     |                     |       |        |                 |          |              |                |                |           | x                | 0.003 | Coleoptilar node     |
|                     |                     |                     |                      |                     |                     |       |        |                 |          |              |                |                |           |                  | x     | Leaf                 |

## ZmlAA12

| Primary root 1-2 cm | Primary root 2-4 cm | Primary root 4-8 cm | Primary root 8-16 cm | Seminal root 1-4 cm | Crown root 0.5-4 cm | Stele | Cortex | Elongation zone | Meristem | Lateral root | Coleoptile (d) | Coleoptile (l) | Mesocotyl | Coleoptilar node | Leaf  |                      |
|---------------------|---------------------|---------------------|----------------------|---------------------|---------------------|-------|--------|-----------------|----------|--------------|----------------|----------------|-----------|------------------|-------|----------------------|
| x                   | 0.062               | 0.003               | 0.004                | 0.093               | 0.072               | 0.251 | 4E-04  | 0.007           | 0.031    | 0.205        | 0.014          | N.D.           | 0.14      | 0.157            | 0.123 | Primary root 1-2 cm  |
|                     | x                   | 0.687               | 0.181                | 0.836               | 0.716               | 0.335 | 0.003  | 0.01            | 0.018    | 0.374        | 0.187          | N.D.           | 0.299     | 0.068            | 0.239 | Primary root 2-4 cm  |
|                     |                     | x                   | 0.256                | 0.564               | 0.895               | 0.327 | 0.004  | 2E-04           | 3E-04    | 0.023        | 0.052          | N.D.           | 0.061     | 0.002            | 0.032 | Primary root 4-8 cm  |
|                     |                     |                     | x                    | 0.365               | 0.256               | 0.357 | 0.004  | 4E-04           | 3E-04    | 0.116        | 0.04           | N.D.           | 0.074     | 0.006            | 0.068 | Primary root 8-16 cm |
|                     |                     |                     |                      | x                   | 0.772               | 0.333 | 0.002  | 0.04            | 0.065    | 0.901        | 0.089          | N.D.           | 0.537     | 0.191            | 0.203 | Seminal root 1-4 cm  |
|                     |                     |                     |                      |                     | x                   | 0.34  | 0.007  | 0.015           | 0.022    | 0.335        | 0.181          | N.D.           | 0.274     | 0.052            | 0.226 | Crown root 0.5-4 cm  |
|                     |                     |                     |                      |                     |                     | x     | 0.649  | 0.21            | 0.215    | 0.49         | 0.465          | N.D.           | 0.487     | 0.296            | 0.471 | Stele                |
|                     |                     |                     |                      |                     |                     |       | x      | 5E-04           | 9E-04    | 0.112        | 0.072          | N.D.           | 0.093     | 0.012            | 0.088 | Cortex               |
|                     |                     |                     |                      |                     |                     |       |        | x               | 0.038    | 0.082        | 0.103          | N.D.           | 0.032     | 0.272            | 0.182 | Elongation zone      |
|                     |                     |                     |                      |                     |                     |       |        |                 | x        | 0.01         | 0.225          | N.D.           | 0.1       | 0.389            | 0.646 | Meristem             |
|                     |                     |                     |                      |                     |                     |       |        |                 |          | x            | 0.083          | N.D.           | 0.249     | 0.009            | 0.046 | Lateral root         |
|                     |                     |                     |                      |                     |                     |       |        |                 |          |              | x              | N.D.           | 0.038     | 0.231            | 0.166 | Coleoptile (d)       |
|                     |                     |                     |                      |                     |                     |       |        |                 |          |              |                | x              | N.D.      | N.D.             | N.D.  | Coleoptile (l)       |
|                     |                     |                     |                      |                     |                     |       |        |                 |          |              |                |                | x         | 0.1              | 0.043 | Mesocotyl            |
|                     |                     |                     |                      |                     |                     |       |        |                 |          |              |                |                |           | x                | 0.737 | Coleoptilar node     |
|                     |                     |                     |                      |                     |                     |       |        |                 |          |              |                |                |           |                  | x     | Leaf                 |

ZmlAA13

| Primary root 1-2 cm | Primary root 2-4 cm | Primary root 4-8 cm | Primary root 8-16 cm | Seminal root 1-4 cm | Crown root 0.5-4 cm | Stele | Cortex | Elongation zone | Meristem | Lateral root | Coleoptile (d) | Coleoptile (l) | Mesocotyl | Coleoptilar node | Leaf |                      |
|---------------------|---------------------|---------------------|----------------------|---------------------|---------------------|-------|--------|-----------------|----------|--------------|----------------|----------------|-----------|------------------|------|----------------------|
| x                   | 0.301               | 0.914               | 0.148                | 0.527               | 0.18                | 0.552 | 0.281  | 0.255           | 0.899    | 0.252        | N.D.           | N.D.           | N.D.      | N.D.             | N.D. | Primary root 1-2 cm  |
|                     | x                   | 0.41                | 0.005                | 0.021               | 8E-04               | 0.249 | 0.06   | 0.017           | 0.426    | 0.069        | N.D.           | N.D.           | N.D.      | N.D.             | N.D. | Primary root 2-4 cm  |
|                     |                     | x                   | 0.249                | 0.467               | 0.179               | 0.624 | 0.348  | 0.256           | 0.698    | 0.483        | N.D.           | N.D.           | N.D.      | N.D.             | N.D. | Primary root 4-8 cm  |
|                     |                     |                     | x                    | 0.556               | 0.063               | 0.035 | 0.003  | 0.008           | 0.698    | 0.027        | N.D.           | N.D.           | N.D.      | N.D.             | N.D. | Primary root 8-16 cm |
|                     |                     |                     |                      | x                   | 0.05                | 0.048 | 0.015  | 0.009           | 0.448    | 0.013        | N.D.           | N.D.           | N.D.      | N.D.             | N.D. | Seminal root 1-4 cm  |
|                     |                     |                     |                      |                     | x                   | 0.015 | 0.003  | 5E-04           | 0.171    | 0.042        | N.D.           | N.D.           | N.D.      | N.D.             | N.D. | Crown root 0.5-4 cm  |
|                     |                     |                     |                      |                     |                     | x     |        |                 | 0.706    | 0.201        | N.D.           | N.D.           | N.D.      | N.D.             | N.D. | Stele                |
|                     |                     |                     |                      |                     |                     |       | x      |                 | 0.263    | 0.263        | N.D.           | N.D.           | N.D.      | N.D.             | N.D. | Cortex               |
|                     |                     |                     |                      |                     |                     |       |        | x               | 0.172    | 0.409        | N.D.           | N.D.           | N.D.      | N.D.             | N.D. | Elongation zone      |
|                     |                     |                     |                      |                     |                     |       |        |                 | x        | 0.29         | N.D.           | N.D.           | N.D.      | N.D.             | N.D. | Meristem             |
|                     |                     |                     |                      |                     |                     |       |        |                 |          | x            | N.D.           | N.D.           | N.D.      | N.D.             | N.D. | Lateral root         |
|                     |                     |                     |                      |                     |                     |       |        |                 |          |              | x              | N.D.           | N.D.      | N.D.             | N.D. | Coleoptile (d)       |
|                     |                     |                     |                      |                     |                     |       |        |                 |          |              |                | x              | N.D.      | N.D.             | N.D. | Coleoptile (l)       |
|                     |                     |                     |                      |                     |                     |       |        |                 |          |              |                |                | x         | N.D.             | N.D. | Mesocotyl            |
|                     |                     |                     |                      |                     |                     |       |        |                 |          |              |                |                |           | x                | N.D. | Coleoptilar node     |
|                     |                     |                     |                      |                     |                     |       |        |                 |          |              |                |                |           |                  | x    | Leaf                 |

|      |                |
|------|----------------|
|      | $p \leq 0.05$  |
|      | $p \leq 0.01$  |
|      | $p \leq 0.001$ |
| N.D. | not detectable |

ZmlAA14

| Primary root 1-2 cm | Primary root 2-4 cm | Primary root 4-8 cm | Primary root 8-16 cm | Seminal root 1-4 cm | Crown root 0.5-4 cm | Stele | Cortex | Elongation zone | Meristem | Lateral root | Coleoptile (d) | Coleoptile (l) | Mesocotyl | Coleoptilar node | Leaf  |                      |
|---------------------|---------------------|---------------------|----------------------|---------------------|---------------------|-------|--------|-----------------|----------|--------------|----------------|----------------|-----------|------------------|-------|----------------------|
| x                   | 0.43                | 0.306               | 0.194                | 0.055               | 0.003               | 0.257 | 0.029  | 0.215           | 0.034    | 0.786        | 0.009          | 0.007          | 0.007     | 0.006            | 0.008 | Primary root 1-2 cm  |
|                     | x                   | 0.706               | 0.081                | 0.242               | 6E-04               | 0.298 | 0.021  | 0.34            | 0.012    | 0.508        | 0.004          | 0.004          | 0.006     | 0.005            | 0.005 | Primary root 2-4 cm  |
|                     |                     | x                   | 0.017                | 0.279               | 0.001               | 0.304 | 0.023  | 0.24            | 0.008    | 0.354        | 7E-04          | 6E-04          | 0.001     | 0.001            | 0.001 | Primary root 4-8 cm  |
|                     |                     |                     | x                    | 0.058               | 3E-04               | 0.194 | 0.019  | 0.688           | 0.008    | 0.965        | 3E-04          | 6E-05          | 1E-04     | 9E-05            | 3E-04 | Primary root 8-16 cm |
|                     |                     |                     |                      | x                   | 0.148               | 0.631 | 0.052  | 0.051           | 0.037    | 0.521        | 0.019          | 0.015          | 0.018     | 0.017            | 0.019 | Seminal root 1-4 cm  |
|                     |                     |                     |                      |                     | x                   | 0.947 | 0.102  | 0.006           | 5E-05    | 0.124        | 4E-05          | 9E-05          | 8E-05     | 6E-05            | 5E-05 | Crown root 0.5-4 cm  |
|                     |                     |                     |                      |                     |                     | x     | 0.32   | 0.219           | 0.145    | 0.24         | 0.094          | 0.098          | 0.097     | 0.094            | 0.094 | Stele                |
|                     |                     |                     |                      |                     |                     |       | x      | 0.033           | 0.016    | 0.305        | 0.012          | 0.011          | 0.013     | 0.012            | 0.012 | Cortex               |
|                     |                     |                     |                      |                     |                     |       |        | x               | 0.154    | 0.512        | 0.029          | 0.027          | 0.024     | 0.022            | 0.026 | Elongation zone      |
|                     |                     |                     |                      |                     |                     |       |        |                 | x        | 0.654        | 0.001          | 0.003          | 0.002     | 9E-04            | 0.002 | Meristem             |
|                     |                     |                     |                      |                     |                     |       |        |                 |          | x            | 0.286          | 0.285          | 0.254     | 0.259            | 0.261 | Lateral root         |
|                     |                     |                     |                      |                     |                     |       |        |                 |          |              | x              | 0.636          | 0.343     | 0.62             | 0.606 | Coleoptile (d)       |
|                     |                     |                     |                      |                     |                     |       |        |                 |          |              |                | x              | 0.303     | 0.82             | 0.565 | Coleoptile (l)       |
|                     |                     |                     |                      |                     |                     |       |        |                 |          |              |                |                | x         | 0.034            | 0.277 | Mesocotyl            |
|                     |                     |                     |                      |                     |                     |       |        |                 |          |              |                |                |           | x                | 0.24  | Coleoptilar node     |
|                     |                     |                     |                      |                     |                     |       |        |                 |          |              |                |                |           |                  | x     | Leaf                 |

ZmlAA15

| Primary root 1-2 cm | Primary root 2-4 cm | Primary root 4-8 cm | Primary root 8-16 cm | Seminal root 1-4 cm | Crown root 0.5-4 cm | Stele | Cortex | Elongation zone | Meristem | Lateral root | Coleoptile (d) | Coleoptile (l) | Mesocotyl | Coleoptilar node | Leaf  |                      |
|---------------------|---------------------|---------------------|----------------------|---------------------|---------------------|-------|--------|-----------------|----------|--------------|----------------|----------------|-----------|------------------|-------|----------------------|
| x                   | 0.366               | 0.486               | 0.042                | 0.169               | 0.027               | 0.738 | 0.199  | 0.075           | 0.119    | 0.216        | 0.007          | 0.019          | 0.063     | 0.069            | 0.023 | Primary root 1-2 cm  |
|                     | x                   | 0.831               | 0.326                | 0.148               | 0.006               | 0.568 | 0.068  | 0.139           | 0.187    | 0.367        | 0.128          | 0.092          | 0.008     | 0.008            | 0.015 | Primary root 2-4 cm  |
|                     |                     | x                   | 0.08                 | 0.096               | 0.009               | 0.594 | 0.124  | 0.242           | 0.204    | 0.231        | 0.053          | 0.016          | 0.151     | 0.108            | 0.014 | Primary root 4-8 cm  |
|                     |                     |                     | x                    | 0.065               | 0.014               | 0.394 | 0.102  | 0.512           | 0.204    | 0.059        | 0.253          | 0.095          | 0.704     | 0.778            | 0.121 | Primary root 8-16 cm |
|                     |                     |                     |                      | x                   | 0.836               | 0.627 | 0.852  | 0.104           | 0.122    | 0.78         | 0.065          | 0.059          | 0.099     | 0.09             | 0.057 | Seminal root 1-4 cm  |
|                     |                     |                     |                      |                     | x                   | 0.475 | 0.446  | 0.006           | 0.021    | 0.707        | 0.009          | 0.007          | 0.006     | 0.004            | 0.004 | Crown root 0.5-4 cm  |
|                     |                     |                     |                      |                     |                     | x     | 0.657  | 0.455           | 0.254    | 0.623        | 0.35           | 0.303          | 0.33      | 0.343            | 0.215 | Stele                |
|                     |                     |                     |                      |                     |                     |       | x      | 0.072           | 0.088    | 0.818        | 0.074          | 0.065          | 0.042     | 0.043            | 0.038 | Cortex               |
|                     |                     |                     |                      |                     |                     |       |        | x               | 0.328    | 0.217        | 0.126          | 0.07           | 0.096     | 0.062            | 0.008 | Elongation zone      |
|                     |                     |                     |                      |                     |                     |       |        |                 | x        | 0.011        | 0.983          | 0.742          | 0.96      | 0.883            | 0.166 | Meristem             |
|                     |                     |                     |                      |                     |                     |       |        |                 |          | x            | 0.096          | 0.086          | 0.226     | 0.227            | 0.119 | Lateral root         |
|                     |                     |                     |                      |                     |                     |       |        |                 |          |              | x              | 0.337          | 0.982     | 0.856            | 0.15  | Coleoptile (d)       |
|                     |                     |                     |                      |                     |                     |       |        |                 |          |              |                | x              | 0.774     | 0.57             | 0.145 | Coleoptile (l)       |
|                     |                     |                     |                      |                     |                     |       |        |                 |          |              |                |                | x         | 0.558            | 0.129 | Mesocotyl            |
|                     |                     |                     |                      |                     |                     |       |        |                 |          |              |                |                |           | x                | 0.032 | Coleoptilar node     |
|                     |                     |                     |                      |                     |                     |       |        |                 |          |              |                |                |           |                  | x     | Leaf                 |

## ZmlAA16

| Primary root 1-2 cm | Primary root 2-4 cm | Primary root 4-8 cm | Primary root 8-16 cm | Seminal root 1-4 cm | Crown root 0.5-4 cm | Stele | Cortex | Elongation zone | Meristem | Lateral root | Coleoptile (d) | Coleoptile (l) | Mesocotyl | Coleoptilar node | Leaf  |                      |
|---------------------|---------------------|---------------------|----------------------|---------------------|---------------------|-------|--------|-----------------|----------|--------------|----------------|----------------|-----------|------------------|-------|----------------------|
| x                   | 0.846               | 0.905               | 0.147                | 0.045               | 1E-04               | 0.284 | 0.007  | 0.041           | 0.018    | 0.208        | 0.045          | 0.02           | 0.014     | 0.102            | 0.031 | Primary root 1-2 cm  |
|                     | x                   | 0.916               | 0.242                | 0.071               | 4E-04               | 0.318 | 0.004  | 0.111           | 0.033    | 0.369        | 0.072          | 0.038          | 0.027     | 0.209            | 0.072 | Primary root 2-4 cm  |
|                     |                     | x                   | 0.001                | 0.086               | 7E-04               | 0.254 | 0.003  | 0.021           | 8E-04    | 0.211        | 0.002          | 5E-04          | 3E-04     | 6E-04            | 4E-04 | Primary root 4-8 cm  |
|                     |                     |                     | x                    | 0.051               | 6E-04               | 0.192 | 0.001  | 0.598           | 8E-04    | 0.188        | 0.005          | 8E-04          | 4E-04     | 0.611            | 0.005 | Primary root 8-16 cm |
|                     |                     |                     |                      | x                   | 0.022               | 0.743 | 0.25   | 0.041           | 0.029    | 0.391        | 0.033          | 0.028          | 0.024     | 0.045            | 0.034 | Seminal root 1-4 cm  |
|                     |                     |                     |                      |                     | x                   | 0.621 | 0.06   | 3E-04           | 4E-04    | 0.604        | 4E-04          | 4E-04          | 3E-04     | 4E-04            | 3E-04 | Crown root 0.5-4 cm  |
|                     |                     |                     |                      |                     |                     | x     | 0.954  | 0.199           | 0.14     | 0.471        | 0.159          | 0.139          | 0.127     | 0.195            | 0.164 | Stele                |
|                     |                     |                     |                      |                     |                     |       | x      | 0.003           | 9E-04    | 0.927        | 6E-04          | 7E-04          | 6E-04     | 0.001            | 0.001 | Cortex               |
|                     |                     |                     |                      |                     |                     |       |        | x               | 0.012    | 0.205        | 0.181          | 0.029          | 0.014     | 0.634            | 0.103 | Elongation zone      |
|                     |                     |                     |                      |                     |                     |       |        |                 | x        | 0.177        | 0.072          | 0.982          | 0.034     | 0.005            | 0.007 | Meristem             |
|                     |                     |                     |                      |                     |                     |       |        |                 |          | x            | 0.186          | 0.173          | 0.165     | 0.189            | 0.182 | Lateral root         |
|                     |                     |                     |                      |                     |                     |       |        |                 |          |              | x              | 0.013          | 0.003     | 0.009            | 0.568 | Coleoptile (d)       |
|                     |                     |                     |                      |                     |                     |       |        |                 |          |              |                | x              | 6E-06     | 0.002            | 0.003 | Coleoptile (l)       |
|                     |                     |                     |                      |                     |                     |       |        |                 |          |              |                |                | x         | 7E-04            | 8E-04 | Mesocotyl            |
|                     |                     |                     |                      |                     |                     |       |        |                 |          |              |                |                |           | x                | 0.003 | Coleoptilar node     |
|                     |                     |                     |                      |                     |                     |       |        |                 |          |              |                |                |           |                  | x     | Leaf                 |

|      |                |
|------|----------------|
|      | $p \leq 0.05$  |
|      | $p \leq 0.01$  |
|      | $p \leq 0.001$ |
| N.D. | not detectable |

## ZmlAA17

| Primary root 1-2 cm | Primary root 2-4 cm | Primary root 4-8 cm | Primary root 8-16 cm | Seminal root 1-4 cm | Crown root 0.5-4 cm | Stele | Cortex | Elongation zone | Meristem | Lateral root | Coleoptile (d) | Coleoptile (l) | Mesocotyl | Coleoptilar node | Leaf  |                      |
|---------------------|---------------------|---------------------|----------------------|---------------------|---------------------|-------|--------|-----------------|----------|--------------|----------------|----------------|-----------|------------------|-------|----------------------|
| x                   | 0.031               | 0.282               | 0.001                | 0.488               | 0.306               | 0.218 | 0.265  | 0.038           | 6E-04    | 0.066        | 6E-04          | 9E-04          | 0.093     | 0.002            | 0.074 | Primary root 1-2 cm  |
|                     | x                   | 0.239               | 0.114                | 0.241               | 0.071               | 0.158 | 0.16   | 0.35            | 0.008    | 0.121        | 0.014          | 0.014          | 0.062     | 0.037            | 0.071 | Primary root 2-4 cm  |
|                     |                     | x                   | 0.081                | 0.337               | 0.063               | 0.185 | 0.16   | 0.213           | 0.025    | 0.332        | 0.03           | 0.043          | 0.115     | 0.077            | 0.982 | Primary root 4-8 cm  |
|                     |                     |                     | x                    | 0.136               | 0.067               | 0.151 | 0.146  | 0.863           | 0.025    | 0.121        | 0.009          | 0.106          | 0.033     | 0.608            | 0.037 | Primary root 8-16 cm |
|                     |                     |                     |                      | x                   | 0.901               | 0.404 | 0.47   | 0.088           | 0.103    | 0.203        | 0.106          | 0.123          | 0.647     | 0.132            | 0.349 | Seminal root 1-4 cm  |
|                     |                     |                     |                      |                     | x                   | 0.294 | 0.248  | 0.084           | 0.041    | 0.311        | 0.045          | 0.05           | 0.7       | 0.06             | 0.148 | Crown root 0.5-4 cm  |
|                     |                     |                     |                      |                     |                     | x     | 0.64   | 0.166           | 0.13     | 0.067        | 0.134          | 0.137          | 0.372     | 0.144            | 0.172 | Stele                |
|                     |                     |                     |                      |                     |                     |       | x      | 0.159           | 0.121    | 0.423        | 0.124          | 0.131          | 0.637     | 0.142            | 0.203 | Cortex               |
|                     |                     |                     |                      |                     |                     |       |        | x               | 0.225    | 0.308        | 0.27           | 0.451          | 0.061     | 0.687            | 0.156 | Elongation zone      |
|                     |                     |                     |                      |                     |                     |       |        |                 | x        | 0.432        | 0.038          | 0.002          | 0.025     | 0.008            | 0.005 | Meristem             |
|                     |                     |                     |                      |                     |                     |       |        |                 |          | x            | 0.647          | 0.143          | 0.265     | 0.021            | 0.053 | Lateral root         |
|                     |                     |                     |                      |                     |                     |       |        |                 |          |              | x              | 0.028          | 0.026     | 0.02             | 0.008 | Coleoptile (d)       |
|                     |                     |                     |                      |                     |                     |       |        |                 |          |              |                | x              | 0.029     | 0.046            | 0.007 | Coleoptile (l)       |
|                     |                     |                     |                      |                     |                     |       |        |                 |          |              |                |                | x         | 0.034            | 0.064 | Mesocotyl            |
|                     |                     |                     |                      |                     |                     |       |        |                 |          |              |                |                |           | x                | 0.012 | Coleoptilar node     |
|                     |                     |                     |                      |                     |                     |       |        |                 |          |              |                |                |           |                  | x     | Leaf                 |

## ZmlAA18

| Primary root 1-2 cm | Primary root 2-4 cm | Primary root 4-8 cm | Primary root 8-16 cm | Seminal root 1-4 cm | Crown root 0.5-4 cm | Stele | Cortex | Elongation zone | Meristem | Lateral root | Coleoptile (d) | Coleoptile (l) | Mesocotyl | Coleoptilar node | Leaf  |                      |
|---------------------|---------------------|---------------------|----------------------|---------------------|---------------------|-------|--------|-----------------|----------|--------------|----------------|----------------|-----------|------------------|-------|----------------------|
| x                   | 0.248               | 0.075               | 0.362                | 0.977               | 0.049               | 0.266 | 0.045  | 0.002           | 0.007    | 0.042        | 0.1            | 0.082          | 0.022     | 0.321            | 0.059 | Primary root 1-2 cm  |
|                     | x                   | 0.083               | 0.12                 | 0.55                | 0.034               | 0.283 | 0.04   | 0.005           | 0.009    | 0.2          | 0.103          | 0.084          | 0.023     | 0.593            | 0.087 | Primary root 2-4 cm  |
|                     |                     | x                   | 0.024                | 0.224               | 0.967               | 0.296 | 0.126  | 0.003           | 0.004    | 0.011        | 0.129          | 0.133          | 0.021     | 0.775            | 0.138 | Primary root 4-8 cm  |
|                     |                     |                     | x                    | 0.714               | 0.018               | 0.256 | 0.045  | 1E-05           | 0.004    | 0.136        | 0.104          | 0.089          | 0.017     | 0.195            | 0.027 | Primary root 8-16 cm |
|                     |                     |                     |                      | x                   | 0.153               | 0.263 | 0.071  | 0.043           | 0.049    | 0.497        | 0.106          | 0.098          | 0.021     | 0.388            | 0.07  | Seminal root 1-4 cm  |
|                     |                     |                     |                      |                     | x                   | 0.303 | 0.085  | 0.002           | 0.002    | 0.1          | 0.117          | 0.109          | 0.024     | 0.845            | 0.16  | Crown root 0.5-4 cm  |
|                     |                     |                     |                      |                     |                     | x     | 0.437  | 0.219           | 0.222    | 0.425        | 0.937          | 0.632          | 0.828     | 0.264            | 0.317 | Stele                |
|                     |                     |                     |                      |                     |                     |       | x      | 0.019           | 0.022    | 0.345        | 0.098          | 0.06           | 0.098     | 0.235            | 0.428 | Cortex               |
|                     |                     |                     |                      |                     |                     |       |        | x               | 0.132    | 0.119        | 0.088          | 0.065          | 0.013     | 0.037            | 0.008 | Elongation zone      |
|                     |                     |                     |                      |                     |                     |       |        |                 | x        | 0.261        | 0.091          | 0.069          | 0.012     | 0.042            | 0.007 | Meristem             |
|                     |                     |                     |                      |                     |                     |       |        |                 |          | x            | 0.337          | 0.295          | 0.119     | 0.29             | 0.096 | Lateral root         |
|                     |                     |                     |                      |                     |                     |       |        |                 |          |              | x              | 0.125          | 0.837     | 0.16             | 0.171 | Coleoptile (d)       |
|                     |                     |                     |                      |                     |                     |       |        |                 |          |              |                | x              | 0.418     | 0.198            | 0.236 | Coleoptile (l)       |
|                     |                     |                     |                      |                     |                     |       |        |                 |          |              |                |                | x         | 0.011            | 0.016 | Mesocotyl            |
|                     |                     |                     |                      |                     |                     |       |        |                 |          |              |                |                |           | x                | 0.092 | Coleoptilar node     |
|                     |                     |                     |                      |                     |                     |       |        |                 |          |              |                |                |           |                  | x     | Leaf                 |

ZmIAA19

| Primary root 1-2 cm | Primary root 2-4 cm | Primary root 4-8 cm | Primary root 8-16 cm | Seminal root 1-4 cm | Crown root 0.5-4 cm | Stele | Cortex | Elongation zone | Meristem | Lateral root | Coleoptile (d) | Coleoptile (l) | Mesocotyl | Coleoptilar node | Leaf  |                      |
|---------------------|---------------------|---------------------|----------------------|---------------------|---------------------|-------|--------|-----------------|----------|--------------|----------------|----------------|-----------|------------------|-------|----------------------|
| x                   | 0.309               | 0.006               | 0.061                | 0.083               | 0.185               | 0.36  | 0.012  | 0.008           | 0.007    | 0.613        | 0.006          | 0.006          | 0.006     | 0.006            | 0.006 | Primary root 1-2 cm  |
|                     | x                   | 0.256               | 0.68                 | 0.21                | 0.119               | 0.447 | 0.028  | 0.007           | 0.007    | 0.34         | 0.007          | 0.007          | 0.008     | 0.007            | 0.007 | Primary root 2-4 cm  |
|                     |                     | x                   | 0.275                | 0.206               | 0.975               | 0.57  | 0.031  | 0.002           | 0.002    | 0.187        | 0.002          | 0.002          | 0.002     | 0.002            | 0.002 | Primary root 4-8 cm  |
|                     |                     |                     | x                    | 0.197               | 0.511               | 0.451 | 0.031  | 0.001           | 0.002    | 0.095        | 0.001          | 0.001          | 0.001     | 0.001            | 0.001 | Primary root 8-16 cm |
|                     |                     |                     |                      | x                   | 0.348               | 0.981 | 0.296  | 0.049           | 0.049    | 0.228        | 0.047          | 0.047          | 0.048     | 0.047            | 0.047 | Seminal root 1-4 cm  |
|                     |                     |                     |                      |                     | x                   | 0.591 | 0.041  | 0.019           | 0.02     | 0.388        | 0.02           | 0.02           | 0.021     | 0.02             | 0.02  | Crown root 0.5-4 cm  |
|                     |                     |                     |                      |                     |                     | x     | 0.716  | 0.201           | 0.199    | 0.484        | 0.195          | 0.195          | 0.199     | 0.195            | 0.195 | Stele                |
|                     |                     |                     |                      |                     |                     |       | x      | 0.009           | 0.009    | 0.295        | 0.009          | 0.009          | 0.009     | 0.009            | 0.009 | Cortex               |
|                     |                     |                     |                      |                     |                     |       |        | x               | 0.284    | 0.246        | 0.044          | 0.05           | 0.884     | 0.05             | 0.049 | Elongation zone      |
|                     |                     |                     |                      |                     |                     |       |        |                 | x        | 0.233        | 0.026          | 0.031          | 0.627     | 0.03             | 0.031 | Meristem             |
|                     |                     |                     |                      |                     |                     |       |        |                 |          | x            | 0.204          | 0.205          | 0.213     | 0.204            | 0.203 | Lateral root         |
|                     |                     |                     |                      |                     |                     |       |        |                 |          |              | x              | 0.008          | 0.001     | 0.003            | 0.107 | Coleoptile (d)       |
|                     |                     |                     |                      |                     |                     |       |        |                 |          |              |                | x              | 0.001     | 0.502            | 0.17  | Coleoptile (l)       |
|                     |                     |                     |                      |                     |                     |       |        |                 |          |              |                |                | x         | 0.002            | 0.001 | Mesocotyl            |
|                     |                     |                     |                      |                     |                     |       |        |                 |          |              |                |                |           | x                | 0.102 | Coleoptilar node     |
|                     |                     |                     |                      |                     |                     |       |        |                 |          |              |                |                |           |                  | x     | Leaf                 |

|      |                |
|------|----------------|
|      | $p \leq 0.05$  |
|      | $p \leq 0.01$  |
|      | $p \leq 0.001$ |
| N.D. | not detectable |

ZmIAA20

| Primary root 1-2 cm | Primary root 2-4 cm | Primary root 4-8 cm | Primary root 8-16 cm | Seminal root 1-4 cm | Crown root 0.5-4 cm | Stele | Cortex | Elongation zone | Meristem | Lateral root | Coleoptile (d) | Coleoptile (l) | Mesocotyl | Coleoptilar node | Leaf  |                      |
|---------------------|---------------------|---------------------|----------------------|---------------------|---------------------|-------|--------|-----------------|----------|--------------|----------------|----------------|-----------|------------------|-------|----------------------|
| x                   | 0.067               | 0.007               | 0.009                | 0.215               | 0.039               | 0.083 | 0.038  | 0.112           | 0.201    | 0.412        | 6E-04          | 0.002          | 0.009     | 0.003            | 5E-04 | Primary root 1-2 cm  |
|                     | x                   | 0.07                | 0.004                | 0.292               | 0.023               | 0.215 | 0.05   | 0.032           | 0.036    | 0.259        | 0.003          | 0.002          | 0.009     | 0.003            | 0.001 | Primary root 2-4 cm  |
|                     |                     | x                   | 0.133                | 0.456               | 0.356               | 0.746 | 0.007  | 0.009           | 0.01     | 0.081        | 5E-04          | 0.004          | 0.009     | 0.003            | 0.002 | Primary root 4-8 cm  |
|                     |                     |                     | x                    | 0.829               | 0.002               | 0.414 | 0.008  | 0.007           | 0.01     | 0.137        | 0.125          | 0.003          | 0.009     | 0.003            | 0.015 | Primary root 8-16 cm |
|                     |                     |                     |                      | x                   | 0.385               | 0.55  | 0.21   | 0.204           | 0.207    | 0.692        | 0.017          | 0.008          | 0.002     | 0.263            | 0.263 | Seminal root 1-4 cm  |
|                     |                     |                     |                      |                     | x                   | 0.476 | 0.034  | 0.027           | 0.029    | 0.266        | 0.008          | 0.002          | 0.009     | 0.003            | 0.003 | Crown root 0.5-4 cm  |
|                     |                     |                     |                      |                     |                     | x     | 0.074  | 0.07            | 0.07     | 0.457        | 0.063          | 0.007          | 0.01      | 0.006            | 1E-03 | Stele                |
|                     |                     |                     |                      |                     |                     |       | x      | 0.335           | 0.597    | 0.028        | 6E-04          | 0.002          | 0.009     | 0.003            | 4E-04 | Cortex               |
|                     |                     |                     |                      |                     |                     |       |        | x               | 0.125    | 0.032        | 8E-04          | 0.002          | 0.009     | 0.003            | 5E-04 | Elongation zone      |
|                     |                     |                     |                      |                     |                     |       |        |                 | x        | 0.195        | 8E-04          | 0.002          | 0.009     | 0.003            | 4E-04 | Meristem             |
|                     |                     |                     |                      |                     |                     |       |        |                 |          | x            | 0.02           | 0.047          | 0.093     | 0.149            | 0.086 | Lateral root         |
|                     |                     |                     |                      |                     |                     |       |        |                 |          |              | x              | 0.008          | 0.01      | 0.004            | 0.026 | Coleoptile (d)       |
|                     |                     |                     |                      |                     |                     |       |        |                 |          |              |                | x              | 0.01      | 0.006            | 0.033 | Coleoptile (l)       |
|                     |                     |                     |                      |                     |                     |       |        |                 |          |              |                |                | x         | 0.011            | 0.01  | Mesocotyl            |
|                     |                     |                     |                      |                     |                     |       |        |                 |          |              |                |                |           | x                | 0.008 | Coleoptilar node     |
|                     |                     |                     |                      |                     |                     |       |        |                 |          |              |                |                |           |                  | x     | Leaf                 |

ZmIAA21

| Primary root 1-2 cm | Primary root 2-4 cm | Primary root 4-8 cm | Primary root 8-16 cm | Seminal root 1-4 cm | Crown root 0.5-4 cm | Stele | Cortex | Elongation zone | Meristem | Lateral root | Coleoptile (d) | Coleoptile (l) | Mesocotyl | Coleoptilar node | Leaf  |                      |
|---------------------|---------------------|---------------------|----------------------|---------------------|---------------------|-------|--------|-----------------|----------|--------------|----------------|----------------|-----------|------------------|-------|----------------------|
| x                   | 0.02                | 0.005               | 0.025                | 0.046               | 0.014               | 0.209 | 0.028  | 0.024           | 0.059    | 0.507        | 0.027          | 0.001          | 0.11      | 0.412            | 0.108 | Primary root 1-2 cm  |
|                     | x                   | 0.748               | 0.65                 | 0.359               | 0.6                 | 0.277 | 0.056  | 0.005           | 0.007    | 0.193        | 0.035          | 0.033          | 0.215     | 0.079            | 0.741 | Primary root 2-4 cm  |
|                     |                     | x                   | 0.64                 | 0.193               | 0.936               | 0.26  | 0.082  | 3E-04           | 5E-04    | 0.045        | 0.005          | 0.011          | 0.219     | 0.043            | 0.034 | Primary root 4-8 cm  |
|                     |                     |                     | x                    | 0.389               | 0.914               | 0.249 | 0.075  | 5E-04           | 5E-04    | 0.081        | 0.009          | 0.018          | 0.212     | 0.014            | 0.052 | Primary root 8-16 cm |
|                     |                     |                     |                      | x                   | 0.322               | 0.252 | 0.06   | 0.02            | 0.029    | 0.014        | 0.077          | 0.058          | 0.221     | 0.211            | 0.063 | Seminal root 1-4 cm  |
|                     |                     |                     |                      |                     | x                   | 0.277 | 0.036  | 0.006           | 0.008    | 0.253        | 0.03           | 0.015          | 0.276     | 0.125            | 0.472 | Crown root 0.5-4 cm  |
|                     |                     |                     |                      |                     |                     | x     | 0.504  | 0.169           | 0.172    | 0.384        | 0.254          | 0.258          | 0.379     | 0.228            | 0.436 | Stele                |
|                     |                     |                     |                      |                     |                     |       | x      | 0.017           | 0.018    | 0.268        | 0.048          | 0.04           | 0.675     | 0.101            | 0.503 | Cortex               |
|                     |                     |                     |                      |                     |                     |       |        | x               | 0.057    | 0.018        | 0.27           | 0.735          | 0.068     | 0.734            | 0.039 | Elongation zone      |
|                     |                     |                     |                      |                     |                     |       |        |                 | x        | 0.124        | 0.661          | 0.715          | 0.071     | 0.936            | 0.031 | Meristem             |
|                     |                     |                     |                      |                     |                     |       |        |                 |          | x            | 0.232          | 0.368          | 0.067     | 0.901            | 0.042 | Lateral root         |
|                     |                     |                     |                      |                     |                     |       |        |                 |          |              | x              | 0.765          | 0.078     | 0.644            | 0.062 | Coleoptile (d)       |
|                     |                     |                     |                      |                     |                     |       |        |                 |          |              |                | x              | 0.087     | 0.632            | 0.092 | Coleoptile (l)       |
|                     |                     |                     |                      |                     |                     |       |        |                 |          |              |                |                | x         | 0.012            | 0.089 | Mesocotyl            |
|                     |                     |                     |                      |                     |                     |       |        |                 |          |              |                |                |           | x                | 0.075 | Coleoptilar node     |
|                     |                     |                     |                      |                     |                     |       |        |                 |          |              |                |                |           |                  | x     | Leaf                 |

ZmlAA23

| Primary root 1-2 cm | Primary root 2-4 cm | Primary root 4-8 cm | Primary root 8-16 cm | Seminal root 1-4 cm | Crown root 0.5-4 cm | Stele | Cortex | Elongation zone | Meristem | Lateral root | Coleoptile (d) | Coleoptile (l) | Mesocotyl | Coleoptilar node | Leaf  |                      |
|---------------------|---------------------|---------------------|----------------------|---------------------|---------------------|-------|--------|-----------------|----------|--------------|----------------|----------------|-----------|------------------|-------|----------------------|
| x                   | 0.075               | 0.013               | 0.052                | 0.224               | 0.052               | 0.28  | 0.008  | 0.031           | 0.111    | 0.826        | 0.047          | 0.036          | 0.054     | 0.066            | 0.249 | Primary root 1-2 cm  |
|                     | x                   | 0.399               | 0.221                | 0.338               | 0.203               | 0.46  | 0.031  | 0.029           | 0.034    | 0.216        | 0.025          | 0.025          | 0.026     | 0.033            | 0.032 | Primary root 2-4 cm  |
|                     |                     | x                   | 0.159                | 0.322               | 0.698               | 0.356 | 0.016  | 9E-04           | 0.003    | 0.277        | 0.003          | 0.002          | 0.003     | 0.001            | 0.01  | Primary root 4-8 cm  |
|                     |                     |                     | x                    | 0.879               | 0.87                | 0.323 | 0.016  | 4E-04           | 0.003    | 0.285        | 0.001          | 0.001          | 0.001     | 8E-05            | 0.002 | Primary root 8-16 cm |
|                     |                     |                     |                      | x                   | 0.838               | 0.332 | 0.02   | 0.038           | 0.069    | 0.728        | 0.054          | 0.052          | 0.053     | 0.048            | 0.119 | Seminal root 1-4 cm  |
|                     |                     |                     |                      |                     | x                   | 0.368 | 0.007  | 0.033           | 0.057    | 0.293        | 0.033          | 0.03           | 0.035     | 0.047            | 0.073 | Crown root 0.5-4 cm  |
|                     |                     |                     |                      |                     |                     | x     | 0.656  | 0.226           | 0.23     | 0.5          | 0.231          | 0.231          | 0.234     | 0.228            | 0.239 | Stele                |
|                     |                     |                     |                      |                     |                     |       | x      | 0.009           | 0.01     | 0.029        | 0.009          | 0.009          | 0.009     | 0.009            | 0.011 | Cortex               |
|                     |                     |                     |                      |                     |                     |       |        | x               | 0.138    | 0.276        | 0.352          | 0.351          | 0.168     | 0.105            | 0.09  | Elongation zone      |
|                     |                     |                     |                      |                     |                     |       |        |                 | x        | 0.572        | 0.309          | 0.308          | 0.515     | 0.224            | 0.104 | Meristem             |
|                     |                     |                     |                      |                     |                     |       |        |                 |          | x            | 0.236          | 0.222          | 0.223     | 0.419            | 0.886 | Lateral root         |
|                     |                     |                     |                      |                     |                     |       |        |                 |          |              | x              | 0.679          | 0.172     | 0.644            | 0.088 | Coleoptile (d)       |
|                     |                     |                     |                      |                     |                     |       |        |                 |          |              |                | x              | 0.165     | 0.583            | 0.104 | Coleoptile (l)       |
|                     |                     |                     |                      |                     |                     |       |        |                 |          |              |                |                | x         | 0.981            | 0.157 | Mesocotyl            |
|                     |                     |                     |                      |                     |                     |       |        |                 |          |              |                |                |           | x                | 0.121 | Coleoptilar node     |
|                     |                     |                     |                      |                     |                     |       |        |                 |          |              |                |                |           |                  | x     | Leaf                 |

|      |                |
|------|----------------|
|      | $p \leq 0.05$  |
|      | $p \leq 0.01$  |
|      | $p \leq 0.001$ |
| N.D. | not detectable |

ZmlAA25

| Primary root 1-2 cm | Primary root 2-4 cm | Primary root 4-8 cm | Primary root 8-16 cm | Seminal root 1-4 cm | Crown root 0.5-4 cm | Stele | Cortex | Elongation zone | Meristem | Lateral root | Coleoptile (d) | Coleoptile (l) | Mesocotyl | Coleoptilar node | Leaf  |                      |
|---------------------|---------------------|---------------------|----------------------|---------------------|---------------------|-------|--------|-----------------|----------|--------------|----------------|----------------|-----------|------------------|-------|----------------------|
| x                   | 0.013               | 0.116               | 0.022                | 0.092               | 0.029               | 0.371 | 0.086  | 0.03            | 0.039    | 0.685        | 0.009          | 0.01           | 0.493     | 0.022            | 0.121 | Primary root 1-2 cm  |
|                     | x                   | 0.007               | 9E-04                | 0.008               | 0.034               | 0.438 | 0.025  | 0.145           | 0.492    | 0.559        | 0.009          | 0.615          | 0.131     | 0.154            | 0.383 | Primary root 2-4 cm  |
|                     |                     | x                   | 0.543                | 0.314               | 0.154               | 0.064 | 0.183  | 0.004           | 9E-04    | 0.986        | 0.006          | 0.004          | 0.977     | 5E-04            | 0.005 | Primary root 4-8 cm  |
|                     |                     |                     | x                    | 0.448               | 0.163               | 0.043 | 0.169  | 0.002           | 9E-04    | 0.874        | 4E-04          | 2E-04          | 0.782     | 0.002            | 0.004 | Primary root 8-16 cm |
|                     |                     |                     |                      | x                   | 0.69                | 0.002 | 0.457  | 0.002           | 0.022    | 0.814        | 0.004          | 0.012          | 0.558     | 0.007            | 0.014 | Seminal root 1-4 cm  |
|                     |                     |                     |                      |                     | x                   | 0.153 | 0.636  | 0.048           | 0.025    | 0.517        | 0.03           | 0.024          | 0.405     | 0.036            | 0.057 | Crown root 0.5-4 cm  |
|                     |                     |                     |                      |                     |                     | x     | 0.035  | 0.1             | 0.357    | 0.812        | 0.142          | 0.419          | 0.194     | 0.166            | 0.718 | Stele                |
|                     |                     |                     |                      |                     |                     |       | x      | 0.017           | 0.034    | 0.308        | 0.016          | 0.019          | 0.094     | 0.017            | 0.017 | Cortex               |
|                     |                     |                     |                      |                     |                     |       |        | x               | 0.963    | 0.571        | 0.505          | 0.294          | 0.079     | 0.818            | 0.049 | Elongation zone      |
|                     |                     |                     |                      |                     |                     |       |        |                 | x        | 0.473        | 0.777          | 0.559          | 0.081     | 0.852            | 0.25  | Meristem             |
|                     |                     |                     |                      |                     |                     |       |        |                 |          | x            | 0.509          | 0.529          | 0.603     | 0.528            | 0.663 | Lateral root         |
|                     |                     |                     |                      |                     |                     |       |        |                 |          |              | x              | 0.076          | 0.087     | 0.741            | 0.074 | Coleoptile (d)       |
|                     |                     |                     |                      |                     |                     |       |        |                 |          |              |                | x              | 0.102     | 0.173            | 0.215 | Coleoptile (l)       |
|                     |                     |                     |                      |                     |                     |       |        |                 |          |              |                |                | x         | 0.061            | 0.094 | Mesocotyl            |
|                     |                     |                     |                      |                     |                     |       |        |                 |          |              |                |                |           | x                | 0.018 | Coleoptilar node     |
|                     |                     |                     |                      |                     |                     |       |        |                 |          |              |                |                |           |                  | x     | Leaf                 |

ZmlAA27

| Primary root 1-2 cm | Primary root 2-4 cm | Primary root 4-8 cm | Primary root 8-16 cm | Seminal root 1-4 cm | Crown root 0.5-4 cm | Stele | Cortex | Elongation zone | Meristem | Lateral root | Coleoptile (d) | Coleoptile (l) | Mesocotyl | Coleoptilar node | Leaf  |                      |
|---------------------|---------------------|---------------------|----------------------|---------------------|---------------------|-------|--------|-----------------|----------|--------------|----------------|----------------|-----------|------------------|-------|----------------------|
| x                   | 0.681               | 0.276               | 0.129                | 0.463               | 0.01                | 0.264 | 0.206  | 0.018           | 0.021    | 0.852        | 0.005          | 0.005          | 0.006     | 0.006            | 0.008 | Primary root 1-2 cm  |
|                     | x                   | 0.099               | 0.374                | 0.365               | 0.042               | 0.183 | 0.169  | 0.116           | 0.082    | 0.276        | 0.028          | 0.026          | 0.026     | 0.026            | 0.03  | Primary root 2-4 cm  |
|                     |                     | x                   | 0.057                | 0.482               | 0.033               | 0.334 | 0.2    | 0.012           | 0.013    | 0.412        | 0.009          | 0.008          | 0.009     | 0.009            | 0.01  | Primary root 4-8 cm  |
|                     |                     |                     | x                    | 0.051               | 0.012               | 0.175 | 0.171  | 0.075           | 0.013    | 0.028        | 8E-04          | 8E-04          | 6E-04     | 8E-04            | 8E-04 | Primary root 8-16 cm |
|                     |                     |                     |                      | x                   | 0.043               | 0.307 | 0.217  | 0.034           | 0.031    | 0.614        | 0.007          | 0.007          | 0.007     | 0.007            | 0.009 | Seminal root 1-4 cm  |
|                     |                     |                     |                      |                     | x                   | 0.554 | 0.293  | 0.002           | 0.003    | 0.252        | 0.002          | 0.002          | 0.003     | 0.002            | 0.003 | Crown root 0.5-4 cm  |
|                     |                     |                     |                      |                     |                     | x     | 0.55   | 0.138           | 0.13     | 0.247        | 0.108          | 0.105          | 0.105     | 0.106            | 0.11  | Stele                |
|                     |                     |                     |                      |                     |                     |       | x      | 0.142           | 0.141    | 0.427        | 0.127          | 0.126          | 0.127     | 0.127            | 0.13  | Cortex               |
|                     |                     |                     |                      |                     |                     |       |        | x               | 0.251    | 0.205        | 0.017          | 0.013          | 0.019     | 0.015            | 0.029 | Elongation zone      |
|                     |                     |                     |                      |                     |                     |       |        |                 | x        | 0.132        | 0.014          | 0.01           | 0.014     | 0.011            | 0.021 | Meristem             |
|                     |                     |                     |                      |                     |                     |       |        |                 |          | x            | 0.03           | 0.028          | 0.015     | 0.026            | 0.019 | Lateral root         |
|                     |                     |                     |                      |                     |                     |       |        |                 |          |              | x              | 0.078          | 0.584     | 0.143            | 0.024 | Coleoptile (d)       |
|                     |                     |                     |                      |                     |                     |       |        |                 |          |              |                | x              | 0.28      | 0.034            | 0.004 | Coleoptile (l)       |
|                     |                     |                     |                      |                     |                     |       |        |                 |          |              |                |                | x         | 0.481            | 8E-04 | Mesocotyl            |
|                     |                     |                     |                      |                     |                     |       |        |                 |          |              |                |                |           | x                | 0.003 | Coleoptilar node     |
|                     |                     |                     |                      |                     |                     |       |        |                 |          |              |                |                |           |                  | x     | Leaf                 |

ZmIAA28

| Primary root 1-2 cm | Primary root 2-4 cm | Primary root 4-8 cm | Primary root 8-16 cm | Seminal root 1-4 cm | Crown root 0.5-4 cm | Stele | Cortex | Elongation zone | Meristem | Lateral root | Coleoptile (d) | Coleoptile (l) | Mesocotyl | Coleoptilar node | Leaf  |                      |
|---------------------|---------------------|---------------------|----------------------|---------------------|---------------------|-------|--------|-----------------|----------|--------------|----------------|----------------|-----------|------------------|-------|----------------------|
| x                   | 0.287               | 0.076               | 0.16                 | 0.047               | 5E-04               | 0.225 | 0.066  | 0.03            | 0.445    | 0.809        | 0.175          | 0.463          | 0.328     | 0.146            | 0.691 | Primary root 1-2 cm  |
|                     | x                   | 0.488               | 0.933                | 0.643               | 0.109               | 0.251 | 0.067  | 0.031           | 0.108    | 0.165        | 0.036          | 0.09           | 0.83      | 0.132            | 0.369 | Primary root 2-4 cm  |
|                     |                     | x                   | 0.527                | 0.905               | 0.103               | 0.266 | 0.163  | 0.001           | 0.014    | 0.236        | 0.002          | 0.002          | 0.191     | 0.014            | 0.023 | Primary root 4-8 cm  |
|                     |                     |                     | x                    | 0.483               | 0.06                | 0.235 | 0.114  | 0.049           | 0.014    | 0.314        | 0.069          | 0.167          | 0.947     | 0.092            | 0.308 | Primary root 8-16 cm |
|                     |                     |                     |                      | x                   | 0.05                | 0.29  | 0.194  | 0.014           | 0.1      | 0.317        | 0.054          | 0.062          | 0.518     | 0.032            | 0.142 | Seminal root 1-4 cm  |
|                     |                     |                     |                      |                     | x                   | 0.337 | 0.272  | 0.001           | 0.02     | 0.02         | 0.008          | 0.005          | 0.095     | 0.001            | 0.02  | Crown root 0.5-4 cm  |
|                     |                     |                     |                      |                     |                     | x     | 0.497  | 0.187           | 0.187    | 0.369        | 0.187          | 0.21           | 0.227     | 0.209            | 0.215 | Stele                |
|                     |                     |                     |                      |                     |                     |       | x      | 0.043           | 0.07     | 0.311        | 0.051          | 0.062          | 0.122     | 0.061            | 0.098 | Cortex               |
|                     |                     |                     |                      |                     |                     |       |        | x               | 0.201    | 0.126        | 0.216          | 0.003          | 0.024     | 0.012            | 0.019 | Elongation zone      |
|                     |                     |                     |                      |                     |                     |       |        |                 | x        | 0.975        | 0.235          | 0.607          | 0.003     | 0.756            | 0.04  | Meristem             |
|                     |                     |                     |                      |                     |                     |       |        |                 |          | x            | 0.59           | 0.737          | 0.369     | 0.553            | 0.724 | Lateral root         |
|                     |                     |                     |                      |                     |                     |       |        |                 |          |              | x              | 0.056          | 0.006     | 0.223            | 0.017 | Coleoptile (d)       |
|                     |                     |                     |                      |                     |                     |       |        |                 |          |              |                | x              | 0.063     | 0.784            | 0.15  | Coleoptile (l)       |
|                     |                     |                     |                      |                     |                     |       |        |                 |          |              |                |                | x         | 0.106            | 0.149 | Mesocotyl            |
|                     |                     |                     |                      |                     |                     |       |        |                 |          |              |                |                |           | x                | 0.134 | Coleoptilar node     |
|                     |                     |                     |                      |                     |                     |       |        |                 |          |              |                |                |           |                  | x     | Leaf                 |

|      |                |
|------|----------------|
|      | $p \leq 0.05$  |
|      | $p \leq 0.01$  |
|      | $p \leq 0.001$ |
| N.D. | not detectable |

ZmIAA29

| Primary root 1-2 cm | Primary root 2-4 cm | Primary root 4-8 cm | Primary root 8-16 cm | Seminal root 1-4 cm | Crown root 0.5-4 cm | Stele | Cortex | Elongation zone | Meristem | Lateral root | Coleoptile (d) | Coleoptile (l) | Mesocotyl | Coleoptilar node | Leaf  |                      |
|---------------------|---------------------|---------------------|----------------------|---------------------|---------------------|-------|--------|-----------------|----------|--------------|----------------|----------------|-----------|------------------|-------|----------------------|
| x                   | 0.29                | 0.114               | 0.829                | 0.154               | 0.099               | 0.439 | 0.022  | 0.005           | 0.066    | 0.646        | 0.007          | 0.005          | 0.125     | 0.024            | 0.023 | Primary root 1-2 cm  |
|                     | x                   | 0.815               | 0.289                | 0.535               | 0.05                | 0.51  | 0.034  | 0.006           | 0.026    | 0.221        | 0.013          | 0.007          | 0.094     | 0.024            | 0.016 | Primary root 2-4 cm  |
|                     |                     | x                   | 0.375                | 0.288               | 0.254               | 0.486 | 0.034  | 0.002           | 0.011    | 0.122        | 0.002          | 0.002          | 0.011     | 0.003            | 0.005 | Primary root 4-8 cm  |
|                     |                     |                     | x                    | 0.295               | 0.102               | 0.406 | 0.034  | 0.001           | 0.011    | 0.157        | 0.002          | 0.001          | 0.035     | 0.003            | 0.001 | Primary root 8-16 cm |
|                     |                     |                     |                      | x                   | 0.937               | 0.711 | 0.036  | 0.039           | 0.1      | 0.084        | 0.041          | 0.041          | 0.098     | 0.062            | 0.065 | Seminal root 1-4 cm  |
|                     |                     |                     |                      |                     | x                   | 0.708 | 0.041  | 0.012           | 0.031    | 0.263        | 0.016          | 0.011          | 0.062     | 0.027            | 0.021 | Crown root 0.5-4 cm  |
|                     |                     |                     |                      |                     |                     | x     | 0.416  | 0.215           | 0.291    | 0.502        | 0.23           | 0.221          | 0.323     | 0.259            | 0.252 | Stele                |
|                     |                     |                     |                      |                     |                     |       | x      | 0.016           | 0.024    | 0.341        | 0.017          | 0.016          | 0.025     | 0.021            | 0.02  | Cortex               |
|                     |                     |                     |                      |                     |                     |       |        | x               | 0.001    | 0.012        | 0.075          | 0.051          | 0.003     | 0.005            | 0.003 | Elongation zone      |
|                     |                     |                     |                      |                     |                     |       |        |                 | x        | 0.321        | 0.01           | 0.002          | 0.222     | 0.035            | 0.007 | Meristem             |
|                     |                     |                     |                      |                     |                     |       |        |                 |          | x            | 0.05           | 0.006          | 0.59      | 0.181            | 0.139 | Lateral root         |
|                     |                     |                     |                      |                     |                     |       |        |                 |          |              | x              | 0.157          | 0.001     | 0.007            | 0.021 | Coleoptile (d)       |
|                     |                     |                     |                      |                     |                     |       |        |                 |          |              |                | x              | 0.005     | 0.01             | 0.007 | Coleoptile (l)       |
|                     |                     |                     |                      |                     |                     |       |        |                 |          |              |                |                | x         | 0.004            | 0.011 | Mesocotyl            |
|                     |                     |                     |                      |                     |                     |       |        |                 |          |              |                |                |           | x                | 0.232 | Coleoptilar node     |
|                     |                     |                     |                      |                     |                     |       |        |                 |          |              |                |                |           |                  | x     | Leaf                 |

ZmIAA30

| Primary root 1-2 cm | Primary root 2-4 cm | Primary root 4-8 cm | Primary root 8-16 cm | Seminal root 1-4 cm | Crown root 0.5-4 cm | Stele | Cortex | Elongation zone | Meristem | Lateral root | Coleoptile (d) | Coleoptile (l) | Mesocotyl | Coleoptilar node | Leaf |                      |
|---------------------|---------------------|---------------------|----------------------|---------------------|---------------------|-------|--------|-----------------|----------|--------------|----------------|----------------|-----------|------------------|------|----------------------|
| x                   | 0.099               | 0.656               | 0.07                 | 0.04                | 0.001               | 0.086 | 0.732  | 0.07            | 0.087    | 0.169        | N.D.           | N.D.           | N.D.      | N.D.             | N.D. | Primary root 1-2 cm  |
|                     | x                   | 0.31                | 0.421                | 0.028               | 4E-04               | 0.592 | 0.29   | 3E-04           | 0.023    | 0.379        | N.D.           | N.D.           | N.D.      | N.D.             | N.D. | Primary root 2-4 cm  |
|                     |                     | x                   | 0.313                | 0.254               | 0.01                | 0.418 | 0.554  | 0.208           | 0.231    | 0.451        | N.D.           | N.D.           | N.D.      | N.D.             | N.D. | Primary root 4-8 cm  |
|                     |                     |                     | x                    | 0.02                | 3E-04               | 0.207 | 0.289  | 0.143           | 0.231    | 0.326        | N.D.           | N.D.           | N.D.      | N.D.             | N.D. | Primary root 8-16 cm |
|                     |                     |                     |                      | x                   | 8E-04               | 0.028 | 0.274  | 0.022           | 0.026    | 0.108        | N.D.           | N.D.           | N.D.      | N.D.             | N.D. | Seminal root 1-4 cm  |
|                     |                     |                     |                      |                     | x                   | 6E-04 | 0.011  | 4E-04           | 5E-04    | 0.022        | N.D.           | N.D.           | N.D.      | N.D.             | N.D. | Crown root 0.5-4 cm  |
|                     |                     |                     |                      |                     |                     | x     | 0.381  | 0.134           | 0.221    | 0.722        | N.D.           | N.D.           | N.D.      | N.D.             | N.D. | Stele                |
|                     |                     |                     |                      |                     |                     |       | x      | 0.203           | 0.226    | 0.529        | N.D.           | N.D.           | N.D.      | N.D.             | N.D. | Cortex               |
|                     |                     |                     |                      |                     |                     |       |        | x               | 0.163    | 0.18         | N.D.           | N.D.           | N.D.      | N.D.             | N.D. | Elongation zone      |
|                     |                     |                     |                      |                     |                     |       |        |                 | x        | 0.134        | N.D.           | N.D.           | N.D.      | N.D.             | N.D. | Meristem             |
|                     |                     |                     |                      |                     |                     |       |        |                 |          | x            | N.D.           | N.D.           | N.D.      | N.D.             | N.D. | Lateral root         |
|                     |                     |                     |                      |                     |                     |       |        |                 |          |              | x              | N.D.           | N.D.      | N.D.             | N.D. | Coleoptile (d)       |
|                     |                     |                     |                      |                     |                     |       |        |                 |          |              |                | x              | N.D.      | N.D.             | N.D. | Coleoptile (l)       |
|                     |                     |                     |                      |                     |                     |       |        |                 |          |              |                |                | x         | N.D.             | N.D. | Mesocotyl            |
|                     |                     |                     |                      |                     |                     |       |        |                 |          |              |                |                |           | x                | N.D. | Coleoptilar node     |
|                     |                     |                     |                      |                     |                     |       |        |                 |          |              |                |                |           |                  | x    | Leaf                 |

ZmlAA32

| Primary root 1-2 cm | Primary root 2-4 cm | Primary root 4-8 cm | Primary root 8-16 cm | Seminal root 1-4 cm | Crown root 0.5-4 cm | Stele | Cortex | Elongation zone | Meristem | Lateral root | Coleoptile (d) | Coleoptile (l) | Mesocotyl | Coleoptilar node | Leaf  |                      |
|---------------------|---------------------|---------------------|----------------------|---------------------|---------------------|-------|--------|-----------------|----------|--------------|----------------|----------------|-----------|------------------|-------|----------------------|
| x                   | 0.028               | 0.163               | 0.031                | 0.061               | 0.075               | 0.143 | 0.06   | 0.009           | 0.007    | 0.17         | 0.004          | 0.004          | 0.004     | 0.004            | 0.004 | Primary root 1-2 cm  |
|                     | x                   | 0.759               | 0.506                | 0.599               | 0.438               | 0.722 | 0.077  | 0.005           | 0.019    | 0.074        | 0.001          | 0.001          | 0.002     | 0.001            | 0.001 | Primary root 2-4 cm  |
|                     |                     | x                   | 0.386                | 0.851               | 0.103               | 0.99  | 0.144  | 0.003           | 0.028    | 0.077        | 0.002          | 0.002          | 0.002     | 0.002            | 0.002 | Primary root 4-8 cm  |
|                     |                     |                     | x                    | 0.231               | 0.836               | 0.289 | 0.069  | 0.003           | 0.028    | 0.005        | 0.002          | 0.002          | 0.002     | 0.002            | 0.002 | Primary root 8-16 cm |
|                     |                     |                     |                      | x                   | 0.377               | 0.862 | 0.025  | 0.009           | 0.003    | 0.162        | 0.003          | 0.003          | 0.003     | 0.002            | 0.002 | Seminal root 1-4 cm  |
|                     |                     |                     |                      |                     | x                   | 0.057 | 0.32   | 0.002           | 0.069    | 0.122        | 0.002          | 0.003          | 0.002     | 0.002            | 0.002 | Crown root 0.5-4 cm  |
|                     |                     |                     |                      |                     |                     | x     | 0.142  | 0.002           | 0.026    | 0.13         | 0.002          | 0.003          | 0.002     | 0.002            | 0.002 | Stele                |
|                     |                     |                     |                      |                     |                     |       | x      | 0.036           | 0.027    | 0.151        | 0.002          | 0.002          | 0.003     | 0.002            | 0.002 | Cortex               |
|                     |                     |                     |                      |                     |                     |       |        | x               | 0.076    | 0.157        | 0.005          | 0.009          | 0.007     | 0.004            | 0.004 | Elongation zone      |
|                     |                     |                     |                      |                     |                     |       |        |                 | x        | 0.246        | 0.005          | 0.006          | 0.006     | 0.005            | 0.005 | Meristem             |
|                     |                     |                     |                      |                     |                     |       |        |                 |          | x            | 0.201          | 0.256          | 0.233     | 0.187            | 0.189 | Lateral root         |
|                     |                     |                     |                      |                     |                     |       |        |                 |          |              | x              | 0.237          | 0.255     | 0.005            | 0.008 | Coleoptile (d)       |
|                     |                     |                     |                      |                     |                     |       |        |                 |          |              |                | x              | 0.013     | 0.002            | 0.005 | Coleoptile (l)       |
|                     |                     |                     |                      |                     |                     |       |        |                 |          |              |                |                | x         | 0.095            | 0.226 | Mesocotyl            |
|                     |                     |                     |                      |                     |                     |       |        |                 |          |              |                |                |           | x                | 0.034 | Coleoptilar node     |
|                     |                     |                     |                      |                     |                     |       |        |                 |          |              |                |                |           |                  | x     | Leaf                 |

|      |                |
|------|----------------|
|      | $p \leq 0.05$  |
|      | $p \leq 0.01$  |
|      | $p \leq 0.001$ |
| N.D. | not detectable |

ZmlAA33

| Primary root 1-2 cm | Primary root 2-4 cm | Primary root 4-8 cm | Primary root 8-16 cm | Seminal root 1-4 cm | Crown root 0.5-4 cm | Stele | Cortex | Elongation zone | Meristem | Lateral root | Coleoptile (d) | Coleoptile (l) | Mesocotyl | Coleoptilar node | Leaf  |                      |
|---------------------|---------------------|---------------------|----------------------|---------------------|---------------------|-------|--------|-----------------|----------|--------------|----------------|----------------|-----------|------------------|-------|----------------------|
| x                   | 0.066               | 0.006               | 0.002                | 0.143               | 0.005               | 0.139 | 0.14   | 0.326           | 0.305    | 0.181        | 0.137          | 0.127          | 0.003     | 0.934            | 0.142 | Primary root 1-2 cm  |
|                     | x                   | 0.024               | 9E-04                | 0.188               | 6E-05               | 0.171 | 0.435  | 0.024           | 0.006    | 0.608        | 0.003          | 0.003          | 0.03      | 0.015            | 0.004 | Primary root 2-4 cm  |
|                     |                     | x                   | 0.008                | 0.346               | 0.264               | 0.311 | 0.124  | 0.037           | 0.009    | 0.354        | 0.007          | 0.006          | 0.557     | 0.009            | 0.007 | Primary root 4-8 cm  |
|                     |                     |                     | x                    | 0.791               | 0.003               | 0.62  | 0.016  | 0.008           | 0.009    | 0.117        | 0.001          | 0.001          | 0.035     | 0.001            | 0.001 | Primary root 8-16 cm |
|                     |                     |                     |                      | x                   | 0.271               | 0.862 | 0.289  | 0.032           | 0.134    | 0.149        | 0.129          | 0.129          | 0.386     | 0.146            | 0.13  | Seminal root 1-4 cm  |
|                     |                     |                     |                      |                     | x                   | 0.239 | 0.672  | 0.005           | 5E-04    | 0.18         | 3E-04          | 3E-04          | 0.203     | 9E-04            | 3E-04 | Crown root 0.5-4 cm  |
|                     |                     |                     |                      |                     |                     | x     | 0.263  | 0.194           | 0.123    | 0.425        | 0.121          | 0.121          | 0.301     | 0.134            | 0.121 | Stele                |
|                     |                     |                     |                      |                     |                     |       | x      | 0.177           | 0.14     | 0.766        | 0.115          | 0.113          | 0.164     | 0.17             | 0.116 | Cortex               |
|                     |                     |                     |                      |                     |                     |       |        | x               | 0.137    | 0.131        | 0.314          | 0.242          | 0.024     | 0.015            | 0.92  | Elongation zone      |
|                     |                     |                     |                      |                     |                     |       |        |                 | x        | 0.097        | 0.05           | 0.04           | 0.006     | 0.013            | 0.048 | Meristem             |
|                     |                     |                     |                      |                     |                     |       |        |                 |          | x            | 0.136          | 0.131          | 0.049     | 0.187            | 0.128 | Lateral root         |
|                     |                     |                     |                      |                     |                     |       |        |                 |          |              | x              | 0.092          | 0.005     | 0.001            | 0.288 | Coleoptile (d)       |
|                     |                     |                     |                      |                     |                     |       |        |                 |          |              |                | x              | 0.005     | 7E-04            | 0.024 | Coleoptile (l)       |
|                     |                     |                     |                      |                     |                     |       |        |                 |          |              |                |                | x         | 0.006            | 0.005 | Mesocotyl            |
|                     |                     |                     |                      |                     |                     |       |        |                 |          |              |                |                |           | x                | 7E-04 | Coleoptilar node     |
|                     |                     |                     |                      |                     |                     |       |        |                 |          |              |                |                |           |                  | x     | Leaf                 |

ZmlAA34

| Primary root 1-2 cm | Primary root 2-4 cm | Primary root 4-8 cm | Primary root 8-16 cm | Seminal root 1-4 cm | Crown root 0.5-4 cm | Stele | Cortex | Elongation zone | Meristem | Lateral root | Coleoptile (d) | Coleoptile (l) | Mesocotyl | Coleoptilar node | Leaf  |                      |
|---------------------|---------------------|---------------------|----------------------|---------------------|---------------------|-------|--------|-----------------|----------|--------------|----------------|----------------|-----------|------------------|-------|----------------------|
| x                   | 0.985               | 0.868               | 0.577                | 0.233               | 0.148               | 0.646 | 0.016  | 0.008           | 0.043    | 0.028        | 0.007          | 0.008          | 0.007     | 0.007            | 0.007 | Primary root 1-2 cm  |
|                     | x                   | 0.9                 | 0.425                | 0.4                 | 0.019               | 0.632 | 0.004  | 0.019           | 0.008    | 0.077        | 0.002          | 0.016          | 0.002     | 0.003            | 0.002 | Primary root 2-4 cm  |
|                     |                     | x                   | 0.23                 | 0.23                | 0.073               | 0.62  | 7E-04  | 0.005           | 0.02     | 0.046        | 1E-04          | 0.002          | 1E-04     | 8E-05            | 9E-05 | Primary root 4-8 cm  |
|                     |                     |                     | x                    | 0.175               | 0.038               | 0.573 | 0.002  | 0.033           | 0.02     | 0.034        | 6E-04          | 0.002          | 6E-04     | 8E-04            | 5E-04 | Primary root 8-16 cm |
|                     |                     |                     |                      | x                   | 0.573               | 0.835 | 0.031  | 0.042           | 0.081    | 0.013        | 0.016          | 0.074          | 0.016     | 0.016            | 0.016 | Seminal root 1-4 cm  |
|                     |                     |                     |                      |                     | x                   | 0.959 | 0.005  | 0.012           | 0.011    | 0.153        | 0.004          | 0.02           | 0.004     | 0.004            | 0.004 | Crown root 0.5-4 cm  |
|                     |                     |                     |                      |                     |                     | x     | 0.345  | 0.395           | 0.407    | 0.503        | 0.278          | 0.374          | 0.279     | 0.292            | 0.28  | Stele                |
|                     |                     |                     |                      |                     |                     |       | x      | 0.157           | 0.093    | 0.084        | 4E-04          | 0.006          | 2E-04     | 0.002            | 9E-04 | Cortex               |
|                     |                     |                     |                      |                     |                     |       |        | x               | 0.426    | 0.126        | 0.014          | 0.009          | 0.014     | 0.018            | 0.017 | Elongation zone      |
|                     |                     |                     |                      |                     |                     |       |        |                 | x        | 0.089        | 0.017          | 0.065          | 0.016     | 0.025            | 0.019 | Meristem             |
|                     |                     |                     |                      |                     |                     |       |        |                 |          | x            | 0.017          | 0.017          | 0.025     | 0.002            | 0.075 | Lateral root         |
|                     |                     |                     |                      |                     |                     |       |        |                 |          |              | x              | 0.003          | 0.303     | 0.01             | 0.032 | Coleoptile (d)       |
|                     |                     |                     |                      |                     |                     |       |        |                 |          |              |                | x              | 0.076     | 0.028            | 0.04  | Coleoptile (l)       |
|                     |                     |                     |                      |                     |                     |       |        |                 |          |              |                |                | x         | 0.013            | 0.239 | Mesocotyl            |
|                     |                     |                     |                      |                     |                     |       |        |                 |          |              |                |                |           | x                | 0.027 | Coleoptilar node     |
|                     |                     |                     |                      |                     |                     |       |        |                 |          |              |                |                |           |                  | x     | Leaf                 |

Figure S4
