# Supplementary material for: The Maize (Zea mays L.) AUXIN/INDOLE-3-ACETIC ACID Gene Family: Phylogeny, Synteny, and Unique Root-Type and Tissue-Specific Expression Patterns during Development
Source: PubMed Central journal article supplement (PMC3815225; doi:10.1371/journal.pone.0078859), 2013-11-01
Supplement: pone.0078859.s005.pdf [file pone.0078859.s005.pdf]

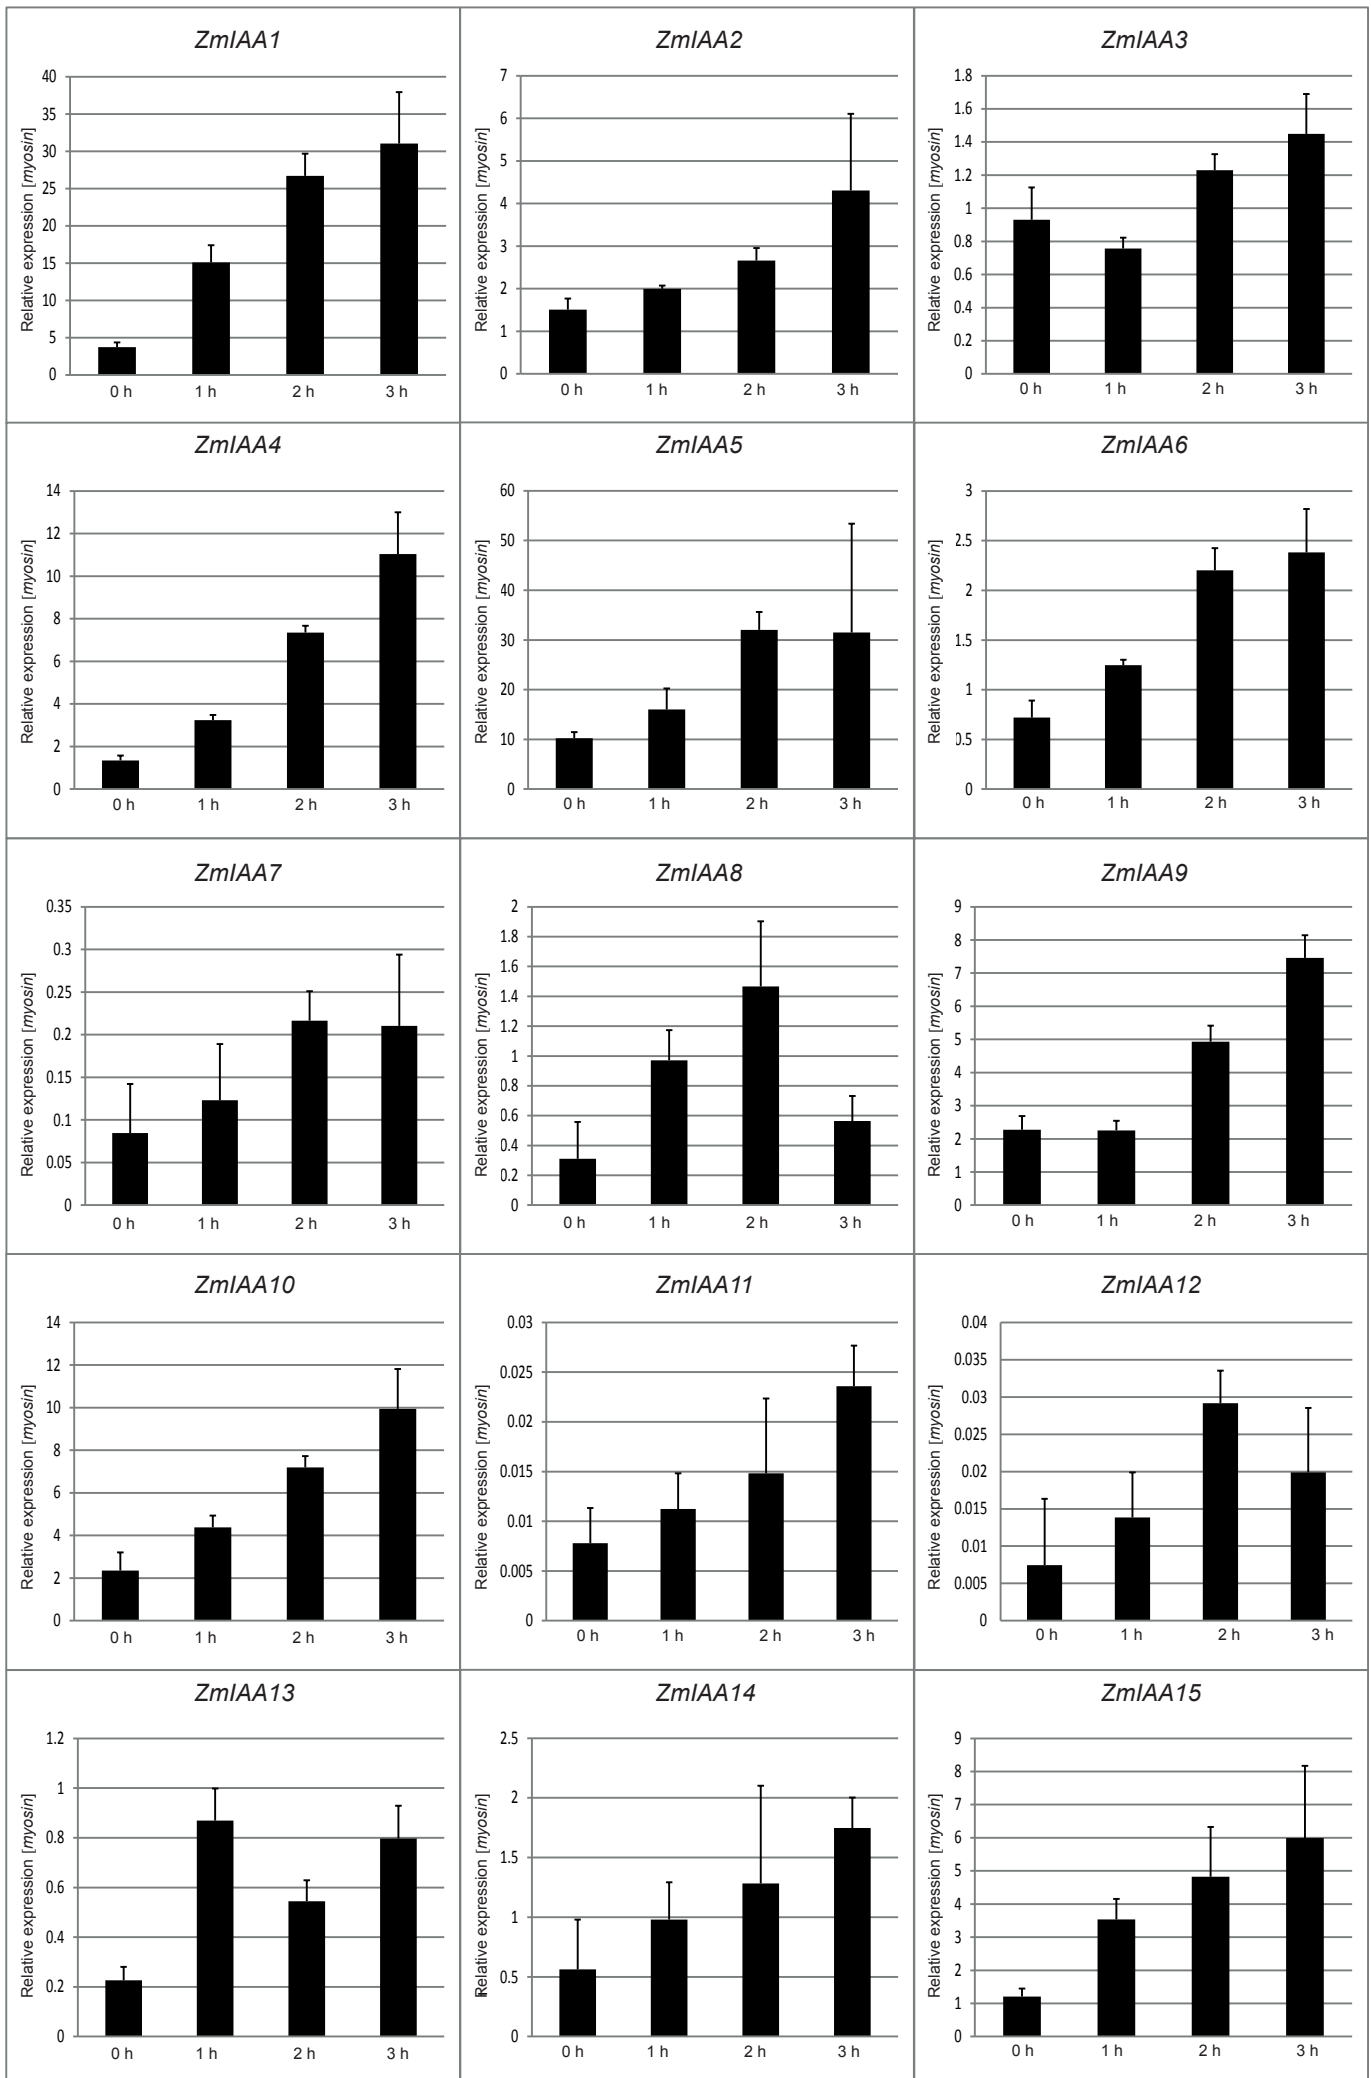

Figure S5-1

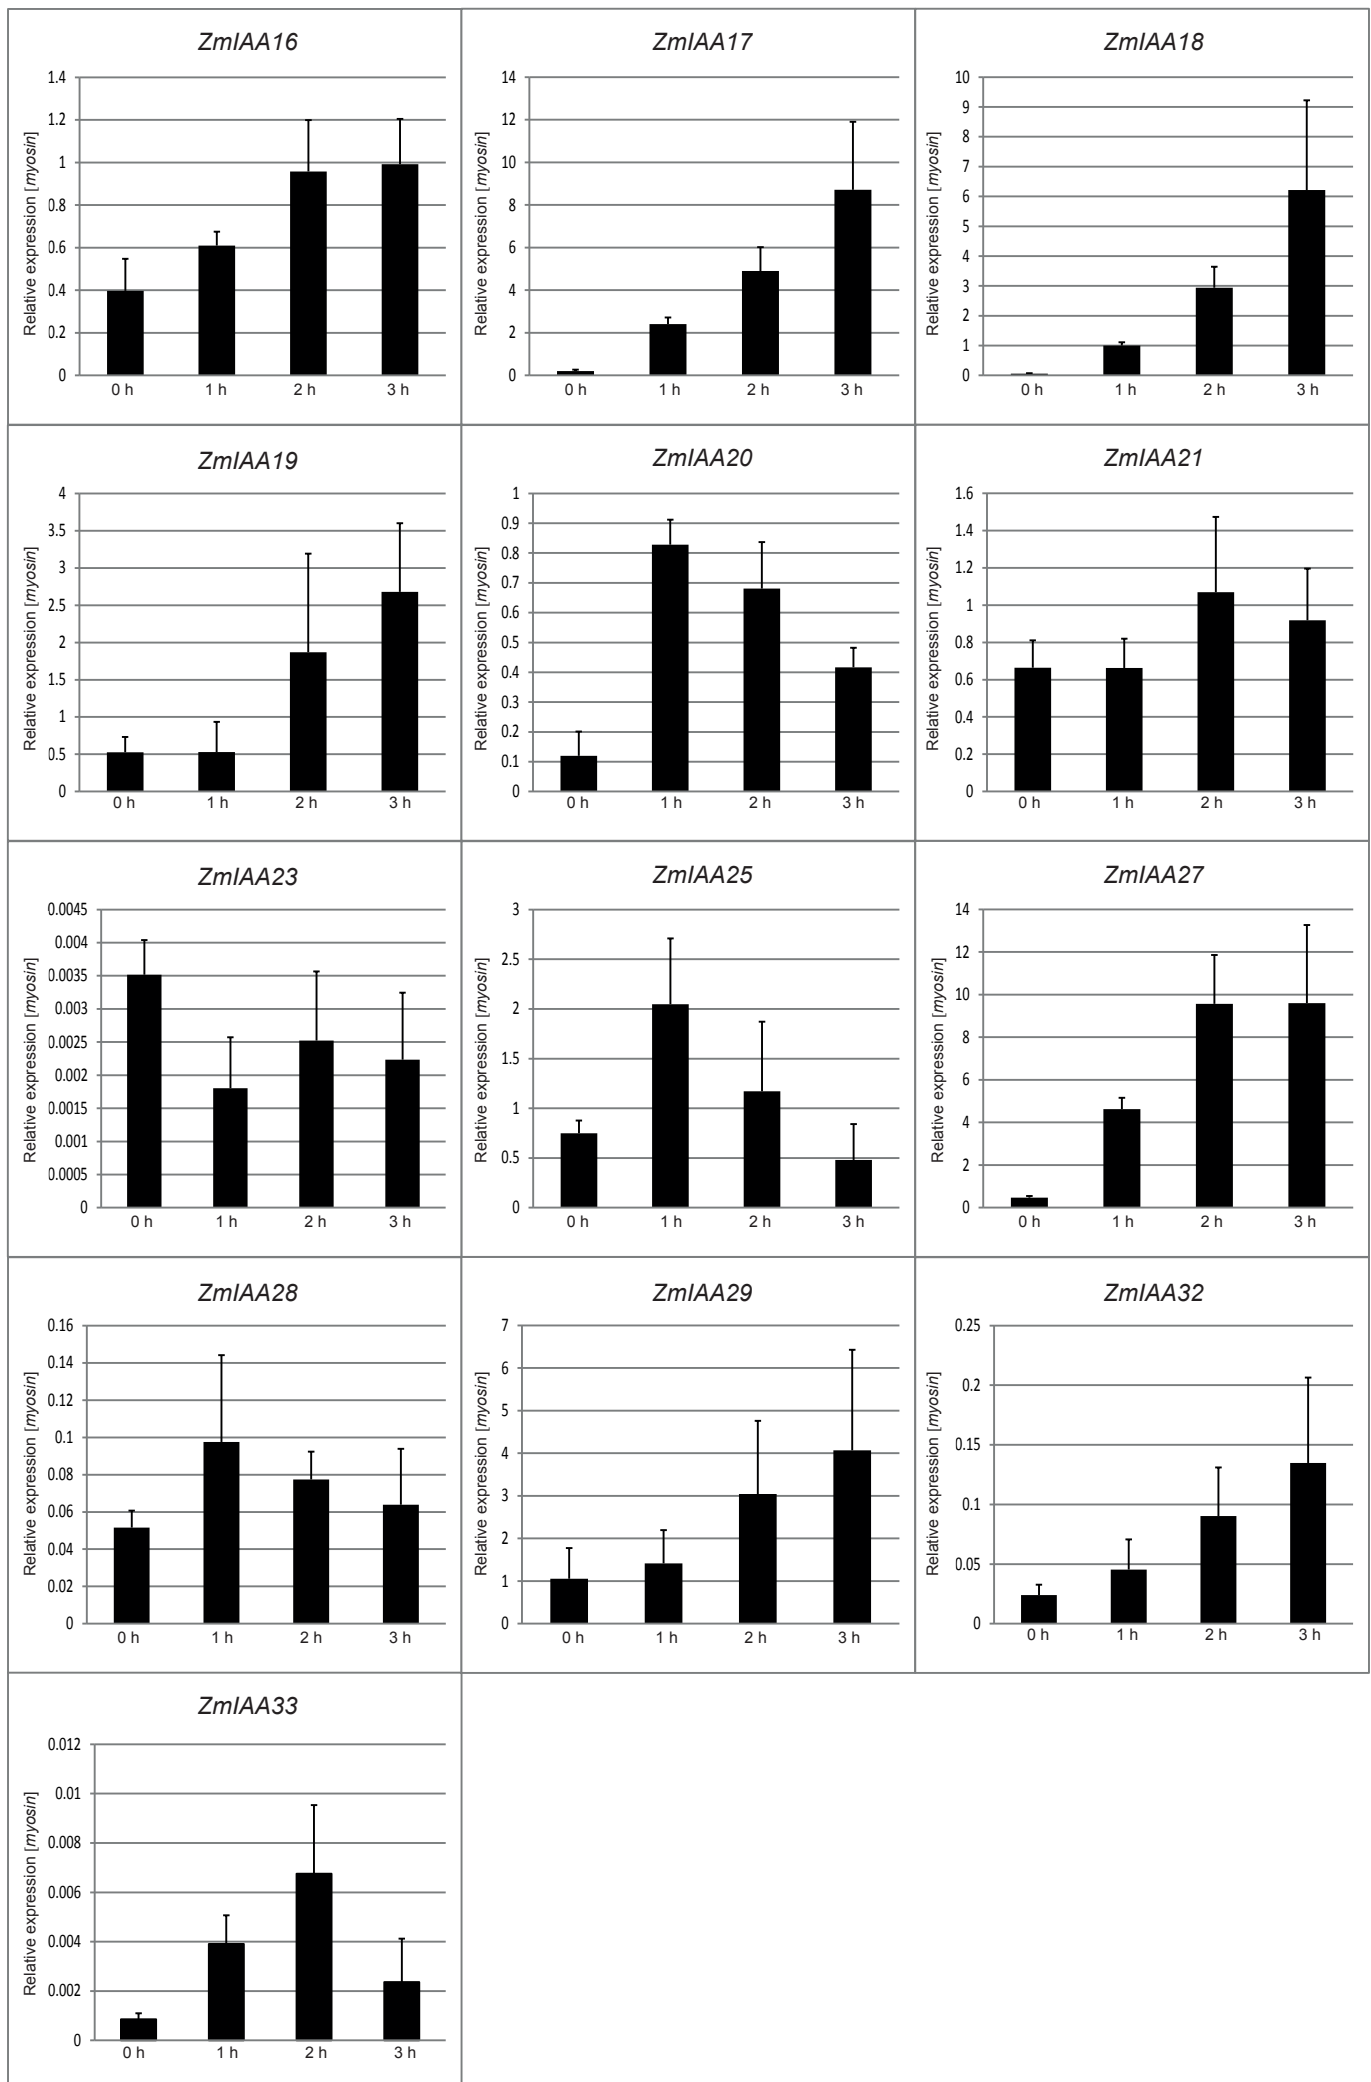

Figure S5-2
